1 **TITLE PAGE**

2 **Title:** Population temporal structure supplements the rate code during sensorimotor transformations

3 **Abbreviated title:** Population temporal dynamics in gaze control

4 **Authors:** Uday K. Jagadisan<sup>1,3</sup> and Neeraj J. Gandhi<sup>1,2,3</sup>

5 **Author affiliations:**

6 <sup>1</sup>Department of Bioengineering

7 <sup>2</sup>Department of Neuroscience

8 <sup>3</sup>Center for the Neural Basis of Cognition

9 University of Pittsburgh, Pittsburgh, PA 15213

10 **Corresponding author:** Uday K. Jagadisan

11 153 Eye and Ear Institute

12 203 Lothrop St

13 Pittsburgh, PA 15213

14 USA

15 Tel: +1-315-4099934

16 Correspondence and requests for more information should be addressed to U.K.J

17 (kj.udayakiran@gmail.com) or N.J.G ([neg8@pitt.edu](mailto:neg8@pitt.edu)).

18 **Author Contributions:** U.K.J and N.J.G designed the study. U.K.J. performed the experiments, analyzed

19 the data, and performed model simulations. U.K.J and N.J.G wrote the manuscript.

20 **Number of pages:** 44

21 **Number of figures:** 6 + 9 extended figures

22 **Number of words:** Abstract - 156, Main text - 4154, Supplementary sections - 2, Methods - 4520

23 **Conflict of interest:** The authors declare no competing financial interests.

24 **Acknowledgements:** We thank Drs. A. Batista, C. Olson, M. Smith, and B. Yu for scientific discussions and

25 critical feedback on previous versions of the manuscript and J. McFerron for programming assistance.

26 The study was funded by the following NIH R01 grants: EY022854 and EY024831 awarded to N.J.G.

27

28

29

30

31

32

33

34

35

36 **Short Summary**

37 Sensorimotor transformations are mediated by premotor brain networks where individual neurons  
38 represent sensory, cognitive, and movement-related information. Such multiplexing poses a conundrum  
39 – how does a decoder know precisely when to initiate a movement if its inputs are active at times when  
40 a movement is not desired (e.g., in response to sensory stimulation)? Here, we propose a novel  
41 hypothesis: movement is triggered not only by an increase in firing rate, but critically by a reliable  
42 temporal pattern in the population response. Laminar recordings in the superior colliculus (SC), a  
43 midbrain hub of orienting control, and pseudo-population analyses in SC and cortical frontal eye fields  
44 (FEF) corroborated this hypothesis. We also used spatiotemporally patterned microstimulation to  
45 causally verify the importance of temporal structure. A spiking neuron model with dendritic integration  
46 was able to decode temporal structure. These findings offer an alternative perspective on movement  
47 generation and highlight the importance of short-term population history in neuronal communication  
48 and behaviour.

49

50 **Long Summary**

51 Sensorimotor transformations are mediated by premotor brain networks where individual neurons  
52 represent sensory, cognitive, and movement-related information. Such multiplexing poses a conundrum  
53 – how does a decoder know precisely when to initiate a movement if its inputs are active at times when  
54 a movement is not desired (e.g., in response to sensory stimulation)? Here, we propose a novel  
55 hypothesis: movement is triggered not only by an increase in firing rate, but critically by a reliable  
56 temporal pattern in the population response. Laminar recordings in the superior colliculus (SC), a  
57 midbrain region that plays an essential role in orienting eye movements, indicate that the temporal  
58 structure across neurons is a factor governing movement initiation. Specifically, using a measure that  
59 captures the fidelity of the population code - here called temporal stability - we show that the temporal  
60 structure fluctuates during the visual response but becomes increasingly stable during the movement  
61 command, even when the mean population activity is similar between the two epochs. Analyses of  
62 pseudo-populations in SC and cortical frontal eye fields (FEF) corroborated this model. We also used  
63 spatiotemporally patterned microstimulation to causally test the contribution of population temporal  
64 stability to movement initiation and found that stable stimulation patterns were more likely to evoke a  
65 movement, even when other features of the patterns such as mean pulse rates and population state  
66 subspaces were matched. Finally, a spiking neuron model was able to discriminate between stable and  
67 unstable input patterns, providing a putative biophysical mechanism for decoding temporal structure.  
68 These findings offer an alternative perspective on the relationship between movement preparation and  
69 generation by situating the correlates of movement initiation in the temporal features of activity in  
70 shared neural substrates. They also suggest a need to look beyond the instantaneous rate code at the  
71 single neuron or population level and consider the effects of short-term population history on neuronal  
72 communication and behaviour.

73

74

75 In order to successfully interact with the environment, the brain must funnel down the sensory inputs it  
76 receives to specific movements at specific times. Such sensory-to-motor transformations are critically  
77 mediated by premotor brain networks where evolving activities in individual neurons represent sensory,  
78 cognitive, and movement-related information<sup>1-3</sup>. For example, in brain regions involved in the control of  
79 gaze, including the SC, so-called visuomovement neurons burst a volley of spikes both in response to a  
80 visual stimulus and for generating a gaze shift or saccade to the location of the stimulus<sup>1</sup>. The dual  
81 nature of visuomovement neurons is best illustrated by examining their activity in the delayed response  
82 paradigm (left panel in Figure 1A), which requires the subject to withhold a saccade to a stimulus in the  
83 visual periphery until after the disappearance of a central fixation cue. We recorded population activity  
84 from the SC using laminar microelectrode arrays (right panel in Figure 1A) in two monkeys (*Macaca*  
85 *mulatta*). Figures 1B and 1C show responses on individual channels and population activity averaged  
86 across channels, respectively, aligned on target (left) and saccade (right) onsets for three example trials  
87 in one session. The population exhibits a high frequency visual burst following target onset and a  
88 subsequent premotor burst prior to a saccade. The peak magnitude of the visual burst is lower than that  
89 of the premotor burst on some trials (light traces in Figure 1C), but it is not uncommon for the peak  
90 visual response to match or exceed the premotor activity (medium and dark traces in Figure 1C),  
91 especially when accounting for the 10-20 ms efferent delay from neural initiation to movement onset<sup>4</sup>  
92 (vertical dashed line in Figure 1C). Yet, on these trials, the visual burst does not trigger a movement, an  
93 observation that casts doubt on thresholding<sup>5,6</sup> as a singular mechanism. Given that such neurons  
94 project directly to the brainstem saccade burst generator that initiates and guides saccadic gaze shifts<sup>7,8</sup>,  
95 we asked how downstream structures are able to differentiate between the two bursts.

96

### 97 **Quantification of population temporal structure**

98 We reasoned that if the mean rate of population activity is insufficient to discriminate between visual  
99 and premotor bursts, the answer likely resides in the spatiotemporal structure of activity during the two  
100 bursts. Indeed, a growing body of work has revealed that precise coordination in the timing of input  
101 spikes is more efficient at driving downstream cortical and subcortical neurons<sup>9-11</sup>. Specifically, we  
102 hypothesized that a critical criterion for a decoder to generate a movement should be a high level of  
103 certainty in the instructed movement and its metrics. Since the exact decoding scheme is unknown, we  
104 hypothesized that certainty is likely provided by consistency in the population pattern over the course of  
105 a burst, under any generalized weighted pooling scheme. To quantify this consistency, we first  
106 constructed a population firing rate trajectory as a function of time. Next, we normalized the population  
107 vector at each time point, constraining it to a unit hypersphere in state space. This step factors out  
108 global changes in firing across the population and focuses on the relative activity pattern. We then  
109 computed the dot product between two of these unit vectors separated in time (parametrized by  $\tau$ ) - we  
110 call this measure the temporal stability of the population code. This procedure is schematized in Figure  
111 1D (for details, see Methods).

112

### 113 **Evolution of population temporal structure during sensorimotor tasks**

114 Figure 1E shows the evolution of temporal stability averaged across all sessions ( $n = 14$ , mean  $\pm$  s.e.m.,  
115 coloured traces, also see EDF 1A). The stability of the population pattern decreased relative to baseline

116 during the visual burst and increased during the premotor burst. Moreover, this property was preserved  
117 when considering only the subset of trials where the peak visual response matched or exceeded the  
118 premotor activity 15 ms before saccade onset (gray trace in Figure 1E), and was significantly different  
119 from the trend in the null condition when the saccade was directed to a stimulus in the opposite  
120 hemifield (black trace in Figure 1E). The anti-phase relationship of stability between the visual and  
121 premotor bursts was also present across a range of separation times between the population vectors  
122 (EDF 1B). We also computed temporal stability by realigning activity on the peak population visual  
123 response, to discount any effect of visual response onset latency differences across the population, and  
124 found similar (if not stronger) effects (Figure 1F). Finally, scrambling the population code by shuffling the  
125 activations of individual neurons at each time point lowered the stability profile for the entire trial  
126 significantly (EDF 1C). Thus, population temporal stability seems to impose a constraint that prevents  
127 movement initiation at an undesirable time (visual epoch), allowing the animal to successfully perform  
128 the task at hand. Once cued to execute a gaze shift, the activity in the same population rises in a stable  
129 manner allowing saccade initiation.

130 Next, we explored the robustness of the temporal stability hypothesis. We tested whether the  
131 properties of stability observed in other populations of neurons or conditions were consistent with its  
132 predicted role in movement initiation. For this part of the study we used data obtained from single-unit  
133 recordings in SC and the frontal eye fields (FEF), the latter of which plays a major role in the cortical  
134 control of saccade initiation<sup>5,12</sup>. Figure 2A shows the average normalized population activity of 57 SC and  
135 22 FEF neurons, affirming the visuomovement pattern of activity discussed above. We then used the  
136 trial-averaged activity of individual neurons to construct a pseudo-population, resulting in an “expected  
137 neural trajectory” on a given trial (Figure 2B), and used this as the input to the temporal stability  
138 computation (for more, see Methods and EDF 2). Since trial-averaged responses are much smoother  
139 than single trial population responses, the stability profiles observed here were relatively smoother and  
140 closer to unity overall compared to the profiles in the previous section, especially during the delay  
141 period (Figure 2C). Notably, the key observations were in line with those observed with simultaneous  
142 population recordings – the dramatic reduction in the stability during the visual burst, and stable activity  
143 during the premotor burst – in both SC and FEF, and were consistent across time separations (EDF 3A)  
144 and subjects (EDF 3B).

145 We then tested whether the temporal stability framework was obeyed by SC neurons beyond those that  
146 are involved in the generation of large saccades. Neurons in the rostral SC are tonically active during  
147 fixation and reduce their activity during larger movements<sup>13</sup> (Figure 2D). Importantly, they also project  
148 to the saccade burst generator<sup>14</sup>. Assuming population stability modulates the input drive to  
149 downstream structures, we hypothesized that the temporal structure in rostral SC neurons must  
150 decrease during large saccades but remain elevated during fixation, even when a visual burst occurs in  
151 other parts of SC and FEF. In other words, we expected the evolution of temporal stability across rostral  
152 SC neurons to be the inverse of what occurs in caudal SC - Figure 2E confirms this prediction. In addition  
153 to the antiphase relationship with caudal SC during large saccades, rostral SC is also known to play a  
154 causal role in the generation of microsaccades<sup>15</sup>. Therefore, we considered whether the rostral SC  
155 population exhibits stable temporal structure during the burst that generates microsaccades. This was  
156 indeed the case (Figure 2F). Thus, the population activity of neurons in rostral SC, including its temporal  
157 structure, supplements the pattern in other parts of SC in suppressing and initiating movements. Finally,

158 pooling neurons in SC and FEF to form a combined population (since they all project to saccade-  
159 generating structures) did not impact the main result (EDF 3C).

160

### 161 **Causal discrimination of population temporal structure**

162 Thus far, we have shown that population temporal structure is a candidate measure that can be used to  
163 discriminate between visual and premotor bursts, using only correlation with the presence or absence of  
164 a movement. To test whether this measure is actively used by the brain in a causal manner, we  
165 performed multi-site patterned microstimulation in SC. We first identified individual contacts of the  
166 laminar probe that evoked low-latency saccades with suprathreshold stimulation, to ensure their  
167 position within the intermediate layers of SC. We then designed temporally stable and unstable  
168 stimulation patterns restricted to these contacts, limiting stimulation parameters for individual sites to  
169 the sub-threshold regime and verifying that the overall stimulation was near-threshold (for details, see  
170 Methods). Stable patterns were created with a linearly decreasing inter-pulse interval (IPI) sequence for  
171 one contact (to simulate a burst) and scaling the IPIs for other contacts by a uniformly spaced factor. For  
172 each stable pattern, we also created a *paired* unstable pattern by jittering the pulse times within a  
173 window and shuffling spikes between contacts, preserving both the pulse count for each site and the  
174 average pulse rate across the “population”. An example pair of stable-unstable pulse trains is shown in  
175 Figure 3A (top row). The bottom row shows the pulse rates determined from these trains, illustrating  
176 the scaled rates for the stable pattern and the fluctuating rates for the unstable pattern for individual  
177 sites, despite the comparable population rates on individual trials (thick traces in the bottom row of  
178 Figure 3A; see EDF 4B,C for more examples). Note that the assignment of high and low rates to different  
179 contacts was randomized across trials, resulting in similar trial-averaged pulse rates for any given  
180 channel, for either type of pattern (Figure 3B). Figure 3C shows the temporal stability for stable and  
181 unstable patterns for all trials in the example session, confirming the impression provided by the pulse  
182 trains and rates, i.e., the scaled patterns are highly stable compared to the relative instability of the  
183 jittered patterns.

184 We delivered these stimulation patterns during the “gap period” in a gap saccade task (EDF 4A). Figure  
185 3D shows a scatter plot of the stimulation-aligned saccade latencies observed using stable versus  
186 unstable stimulation patterns for all pairs from one session. For the majority of stable-unstable trial  
187 pairs, a saccade was evoked with the stable but not the unstable pattern (points in the blue shaded  
188 window spanning the stimulation duration in Figure 3D). The relative likelihood of evoking a movement  
189 with the stable stimulation pattern only (as described in the inset in Figure 3D) is shown as a function of  
190 session number in Figures 3E (blue points). For most sessions, the observed relative likelihood values  
191 were significantly higher (i.e., biased towards the stable pattern;  $p < 0.01$ , permutation tests) than the  
192 null distribution (gray points) obtained by shuffling trials with randomly assigned stable-unstable  
193 identities, reinforcing the observation that the stable pattern was more likely to evoke a movement  
194 compared to a *state-matched* unstable pattern. We also analyzed the movement vectors evoked by  
195 stable and unstable patterns – both sets of saccades, when they occurred, were similar to each other in  
196 both amplitude and direction (EDF 5;  $p > 0.01$  for most sessions, Wilcoxon signed-rank tests) and to the  
197 “fixed vector saccades” evoked by constant frequency multi-channel stimulation, in amplitude (EDF 5;  $p$   
198  $> 0.01$  for most sessions, Wilcoxon rank-sum tests; for details, see Methods).

199

## 200 **Comparison with other population-based models of movement generation**

201 Having demonstrated the role of population temporal structure in saccade initiation using both  
202 correlative and causal approaches, we sought to disambiguate the stability framework from extant  
203 models of movement initiation. We earlier argued for the implausibility of threshold-based gating based  
204 on the fact that the population activity during the visual burst can sometimes exceed premotor activity  
205 (Figure 1C). Could other population activity-based mechanisms, such as the optimal or potent subspace  
206 model that seems to govern movement generation in the skeletomotor system<sup>16-18</sup>, play a role here? To  
207 verify this, we first used factor analysis (FA) to visualize the low-dimensional neural states in the visual  
208 and premotor bursts<sup>19</sup>. An example 3-dimensional FA projection of the two bursts is shown in Figure 4A  
209 – the two sets of states are clearly separable, likely an effect of the subtle yet distinct trends in visual  
210 versus premotor activity levels along the dorso-ventral extent of the SC (e.g., Figure 1B). Indeed, a linear  
211 discriminant analysis (LDA) classifier was able to easily discriminate between the visual and premotor  
212 states, confirming the result of visualization (purple points in Figure 4B, also see EDF 6). The properties  
213 of neural activity in SC therefore seem to be consistent with a static state space code as well.

214 Next, we used data from the patterned microstimulation experiments to disambiguate between the  
215 optimal subspace and temporal stability frameworks. Using a representative low-dimensional FA  
216 projection to visualize the stimulation patterns was infeasible because all the electrode sites contributed  
217 equally to the patterns, due to the random assignment of pulse rates across sites on different trials.  
218 Indeed, it was evident that the stable and unstable patterns were indiscriminable in state space as  
219 shown in an example 3-dimensional projection (Figure 4C; the eigenspectrum in the inset shows  
220 gradually increasing cumulative variance with FA dimension). To confirm this, we trained an LDA  
221 classifier to discriminate between stable and unstable patterns based on population pulse states alone,  
222 and never observed above-chance classification (Figure 4D, also see EDF 6). This result provides a key  
223 piece of evidence in support of the notion that the brain in fact uses temporal stability information,  
224 since the evoked behavior reflected the difference between stable and unstable patterns while a linear  
225 readout of population states did not. However, it is still possible that certain sites or dimensions are  
226 more potent in evoking movements compared to others, a property which may not be revealed when  
227 classifying patterns based on stability alone.

228 To explicitly test this possibility, we trained another LDA classifier to discriminate between trials in which  
229 stimulation evoked a movement and those where no movements were evoked. In order to estimate the  
230 effect of population states independent of the contribution of temporal stability, we divided the pairs of  
231 stable-unstable trials into two subsets – the stability subset (SS), which was made up of trial pairs where  
232 only one of the stable-unstable pair evoked a movement, and the neutral subset (NS), made up of trial  
233 pairs where either both or neither of the stable-unstable pair evoked a movement (Figure 4E). When  
234 trained on the NS trials alone, the linear decoder was able to successfully discriminate trials in which a  
235 movement was evoked (orange points in Figure 4F), indicating that the population pulse states  
236 contained significant information about movement initiation likelihood. Since the stable-unstable pairs  
237 were matched in terms of whether a movement was evoked or not for this subset, this readout of the  
238 population pattern was independent of its temporal structure. In contrast, a linear decoder trained on  
239 the SS trials was unable to determine whether a movement was evoked on a given trial with above-  
240 chance accuracy (brown points in Figure 4F). Crucially, when the population pulse states were  
241 supplemented with stability information (added as a native dimension in the input to the decoder),  
242 classifier performance increased to reflect the trend in relative likelihood estimates in Figure 3E (green

243 points in Figure 4F, also see EDF 6). This analysis thus reveals two independent contributors to  
244 movement initiation in SC – a static “laminar” code, presumably related to the optimal or potent  
245 subspace, that may be a function of the distribution of preferred stimulation sites, and a dynamic  
246 “temporal” code, where stability of the population pattern controls movement initiation even under  
247 matched state space conditions.

248 We also tested how the temporal stability hypothesis was related to modified threshold-based  
249 mechanisms that rely on pooling the activity of a correlated ensemble of neurons<sup>20</sup>. In this framework,  
250 correlations in the accumulation rates of neurons influence movement initiation (reaction times) under  
251 a given pooling scheme, with higher correlations leading to shorter reaction times. Spike count  
252 correlations between SC neurons in the visual and premotor epochs (for details, see Methods) were  
253 inconsistent with this notion – the correlations during the visual epoch were slightly, but significantly,  
254 higher compared to the premotor epoch (EDF 7A, mean difference between visual and premotor epoch  
255 correlations = 0.0167 > 0,  $p = 2.5E-6$ , one-tailed t-test). We also computed pulse count correlations for  
256 the stable and unstable stimulation patterns and found no difference (EDF 7B, median difference in  
257 correlations between conditions = 4.11E-4, not significantly different from 0,  $p = 0.279$ , Wilcoxon signed-  
258 rank test), despite the significant difference in their effects on behavior. Thus, the temporal stability  
259 framework is, to a large extent, independent of extant models of movement initiation.

260

## 261 **Biophysical models for decoding population temporal structure**

262 Finally, we sought to identify a mechanism by which downstream neurons could discriminate between  
263 stable and unstable population codes. We modelled the decoder as a spiking neuron that receives  
264 population inputs through its network of dendrites (Figure 5A). The decoder can be thought to represent  
265 neurons in the pons that receive and integrate inputs from the superior colliculus and burst for  
266 saccades<sup>14</sup>. To mimic the potent inhibitory gating (and disinhibition during saccades) provided by the  
267 omnipause neurons (OPNs) on the burst neurons, we also included a spiking disinhibitor unit with  
268 reciprocal inhibitory connections with the decoder. The disinhibitor also received both excitatory and  
269 inhibitory inputs from the same population as the decoder<sup>21</sup>, creating a balance between excitation and  
270 inhibition that must be overcome in order to produce a saccade<sup>22</sup>. How might the population pattern be  
271 converted into a signal that initiates a movement only when the inputs are stable? Conceptually, the  
272 decoder should have a mechanism to keep track of the short-term history of population activity, use this  
273 history to evaluate temporal structure, and respond selectively when the activity pattern is deemed  
274 stable over the time scale of integration. We incorporated these heuristic requirements by using state-  
275 dependent modulation of input-evoked excitatory post-synaptic potentials in the decoder, i.e., inputs  
276 arriving when the local post-synaptic potential was depolarized caused a higher subsequent change in  
277 the potential<sup>23,24</sup> (Figure 5B).

278 We simulated the model with the stable and unstable patterns from the microstimulation experiments  
279 as inputs, since they readily offered mean-matched input sequences differing only in temporal structure.  
280 We characterized the efficacy of integration by the decoder as the time of first spike in the burst, a  
281 proxy for movement initiation latency. Although there were several pairs of trials for which both the  
282 stable and unstable inputs caused the decoder to spike or neither did (Figure 5C), there were a number  
283 of pairs for which only the stable input pattern was decoded (arrow in Figure 5C). To facilitate  
284 visualization and comparison with experimental data (Figure 3D), latency values greater than the

285 stimulation duration were randomly assigned when the decoder wasn't recruited. Figure 5D shows the  
286 membrane potential output of the disinhibitor (cyan and magenta traces) and decoder (blue and red  
287 traces) units for a pair of stable (top row) and unstable (bottom row) input patterns from this subset of  
288 trial pairs (see EDF 8 for examples from the other subsets). For these pairs, the disinhibitor maintained a  
289 tonic firing rate throughout the trial when the inputs were unstable, and sharply reduced its activity at  
290 some point during stable stimulation (Figure 5E - magenta and cyan traces, respectively). This latter  
291 disinhibition on stable trials was in anti-phase relationship with the bursting exhibited by the decoder,  
292 which was absent on unstable trials (Figure 5E - blue and red traces, respectively). The firing rate profiles  
293 of the decoder and disinhibitor units share a striking resemblance to medium-lead burst neurons and  
294 OPNs, respectively, in the pons<sup>25</sup>. Thus, a relatively simple, yet biophysically realistic, module seems  
295 capable of discriminating between population inputs based solely on their temporal characteristics,  
296 offering a putative mechanism by which downstream networks could use temporal information to make  
297 decisions about movement generation. We also found that a firing rate-based accumulator model with  
298 short-term synaptic plasticity produces comparable results (EDF 9), demonstrating the flexibility of  
299 various biophysical mechanisms in their ability to decode temporal structure and hence, the model-  
300 independence of this result.

301

### 302 **Perspectives on the role of temporal structure**

303 Neurons in premotor structures are constantly bombarded with information from thousands of  
304 presynaptic neurons that are active during sensorimotor processing. It is unclear how activity relevant  
305 for movement initiation is discriminated from activity related to other processing. Extant models of  
306 movement generation that rely on firing rate, including rise-to-threshold<sup>5</sup>, inhibitory gating<sup>25</sup>, and  
307 dynamical switches at the population level<sup>16,17</sup>, leave certain explanatory gaps unfilled. A canonical  
308 model of movement initiation, especially in the oculomotor system, is threshold-based gating<sup>5</sup> (Figure  
309 6A-B). Current knowledge points to a role by the OPNs in defining the threshold and controlling saccade  
310 initiation<sup>5,26</sup>. However, thresholds vary across behavioural paradigms<sup>6,27</sup>, raising the question of how the  
311 threshold is set in a particular condition. Furthermore, evidence that the threshold changes during the  
312 course of a trial purely based on OPN activity is limited<sup>26</sup>. Critically, the existence of trials in which the  
313 population activity during the visual response exceeds premotor activity strongly reduces the likelihood  
314 of thresholding operating as a singular mechanism. An extension of simple thresholding is a mechanism  
315 based on the pooled activity of neurons with varying degrees of correlation in the population<sup>20</sup>.  
316 However, we show that population correlation statistics are not necessarily related to temporal  
317 structure or saccade initiation (EDF 7). A related explanation is that a movement is initiated only when  
318 movement-related neurons are active, but most neurons in sensorimotor structures likely span a  
319 continuum between having visuomovement activity to pure movement activity<sup>1,28</sup>.

320 Other models, primarily in the skeletomotor system, posit that muscles are recruited and a movement is  
321 initiated when neural activity traverses certain optimal regions of the population state space<sup>16</sup> and is  
322 inhibited otherwise, e.g., during movement preparation<sup>17,18</sup> (Figure 6C). While the optimal subspace and  
323 nullspace hypotheses certainly seem to be consistent with recorded neural activity in SC (Figure 4A,B),  
324 they cannot readily account for the observation that neck<sup>29</sup> and upper limb<sup>30</sup> muscles are recruited time-  
325 locked to the visual target, as proxied through electromyography. We instead show that temporal  
326 stability plays an independent role in determining movement initiation, even when the putative potent



327 subspace is matched (Figure 4E, green symbols). We reason that for a decoder downstream, it is  
328 important to ensure the stability - or consistency over time - of the input code while processing it in  
329 order to influence the motor output. Population activity that creates a high firing rate drive but is  
330 inconsistent should be prevented from triggering a movement. This requirement is critical especially in  
331 the case of ballistic movements such as saccades, where the ability to reverse the decision once the  
332 movement has been initiated is limited. Thus, we present a novel mechanism, wherein both high firing  
333 rate and consistent temporal structure are necessary conditions for movement initiation, allowing for  
334 population trajectories that traverse away (increasing overall rate) but within hypersectors that fan out  
335 (stable temporal pattern) from the state space origin (Figure 6D). Note that this model does not  
336 preclude population activity from traversing a localized “optimal” region of state space, possibly due to  
337 hardwired network constraints. Moreover, the proposed mechanism is also consistent with classical  
338 population vector decoding schemes, since any weighted population vector readout during the sensory  
339 and movement epochs will produce decoded movement vectors that are largely similar. This allows for  
340 the same physical movement to be planned and executed by a given population of neurons in the  
341 labelled line sense, a possibility that is precluded by weighted neural readout mechanisms of movement  
342 preparation and generation, such as the potent/nullspace models.

343 Our findings are closely related to the premotor theory of attention<sup>31</sup> and offer a way to reconcile the  
344 attention- intention debate. They could also account for the mirror-like activity recorded during both  
345 action observation and execution in neurons known to project directly to motoneurons in the spinal  
346 cord<sup>32</sup>. In both cases, it is unclear how the same neuronal population represents two distinct signals that  
347 serve different functional roles. The results presented here suggest that this multiplexing ability may be  
348 provided by the distinct temporal structures of population activity patterns. Indeed, intracellular  
349 recordings have demonstrated that visual stimulation drives cortical networks into an asynchronous  
350 state<sup>33</sup>, which may be a critical requirement for sensory processing. In addition, the differential effects  
351 of stable and unstable population stimulation patterns are reminiscent of the desynchronizing effects of  
352 patterned deep brain stimulation recently developed for the treatment of Parkinson’s disease<sup>34</sup>. In this  
353 so-called “coordinated reset” approach, sequential, non-overlapping spatiotemporal sequences are  
354 more effective at resetting the affected neuronal population from the pathological synchronized state to  
355 an asynchronous state, enabling better movement control<sup>35</sup>.

356 Previous studies have looked at the role of precise coordination in the timing of incoming spikes in the  
357 transmission of information and the efficacy of driving the recipient neuron<sup>9,10</sup>. However, input firing  
358 rates may vary greatly across the population, limiting the ability to compare to spike times. Our study  
359 proposes a mean-field equivalent to the spike-based temporal or correlation code<sup>11,36</sup> by looking at the  
360 temporal structure of population firing rates, thus tying together the notion of rate, temporal, and  
361 population codes. We suggest that temporal structure of population activity is critical to understanding  
362 movement generation as well as, more broadly, neuronal communication and its relationship to  
363 behaviour.

364

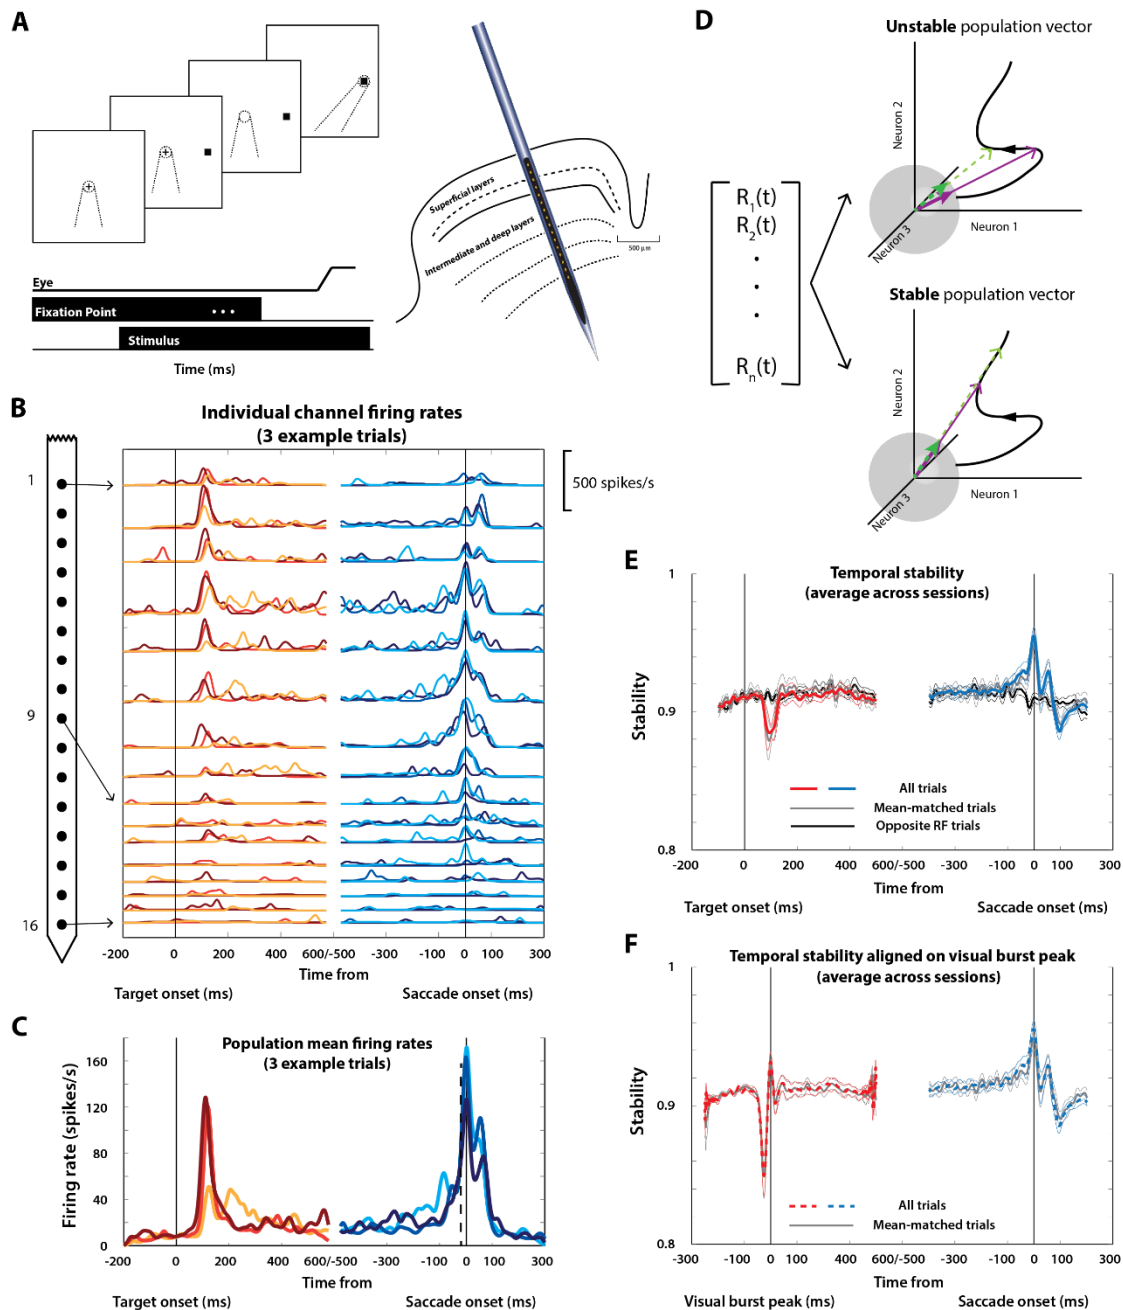

365

366

367 **Figure 1. Temporal structure of population activity during sensorimotor multiplexing.** A. Left - Sequence of  
 368 events in the delayed saccade task. The top row shows a typical display sequence and the bottom rows show the  
 369 timeline. The fixation target is shown as a plus symbol for illustration purposes. Dotted lines depict line of sight of  
 370 the animal. Right – Linear electrode arrays with 16-24 contacts were used to penetrate the SC normal to the  
 371 surface. Thus, the recordings were along a dorso-ventral “column” of the SC. B. Example recording session showing  
 372 activity from 16 channels aligned on target (left column) and saccade (right column) onsets for 3 different trials  
 373 (traces with different colour saturations). C. Population activity averaged across the 16 channels for the 3 trials  
 374 shown in B. Note the considerable variation in the amplitude of the visual burst. D. Schematic depicting  
 375 computation of temporal stability. The population vector (left column) was used to construct a single-trial neural

376 trajectory, which was then normalized at each instance to represent a unit length population vector traversing  
377 along a hypersphere (right column). The top panel in the right column highlights an unstable part of a schematic  
378 trajectory and the bottom panel emphasizes a stable part. Note that in both cases, the two population vectors  
379 (thin arrows in green and purple) are separated by a similar length of time. In the unstable case, the normalized  
380 vectors (thick arrows) move around on the surface of the hypersphere (green and purple vectors are spatially  
381 separate), whereas in the stable case, they stay pointed roughly in the same direction (the two vectors overlap in  
382 space). **E.** Temporal stability is computed as a dot product between two normalized population vectors separated  
383 by  $2\tau = 20\text{ ms}$  aligned on target (left) and saccade (right) onsets. The stability of population activity drastically  
384 decreases during the visual burst (red traces, mean  $\pm$  s.e.m.;  $p < 0.01$  for Wilcoxon signed-rank test with respect  
385 to baseline) and increases before and during movement onset (blue traces;  $p < 0.01$  for Wilcoxon signed-rank test  
386 with respect to baseline). The gray trace is the stability computed only for those trials where the peak visual burst  
387 matched or exceeded activity during the premotor burst at saccade initiation (after accounting for an efferent  
388 delay of 15 ms). The black trace shows population stability on trials in which the target and saccade were directed  
389 away from the response field (RF) of the neurons. **F.** Temporal stability aligned to peak visual burst. The peak time  
390 was computed on the average population response of each trial, and the peak-aligned trace was averaged across  
391 trials and sessions. Note the sharper dip in the stability of the visual response when aligned to the peak. Like in E,  
392 the gray trace shows peak-aligned stability for trials in which the peak visual activity matched or exceeded  
393 premotor activity at saccade initiation.

394

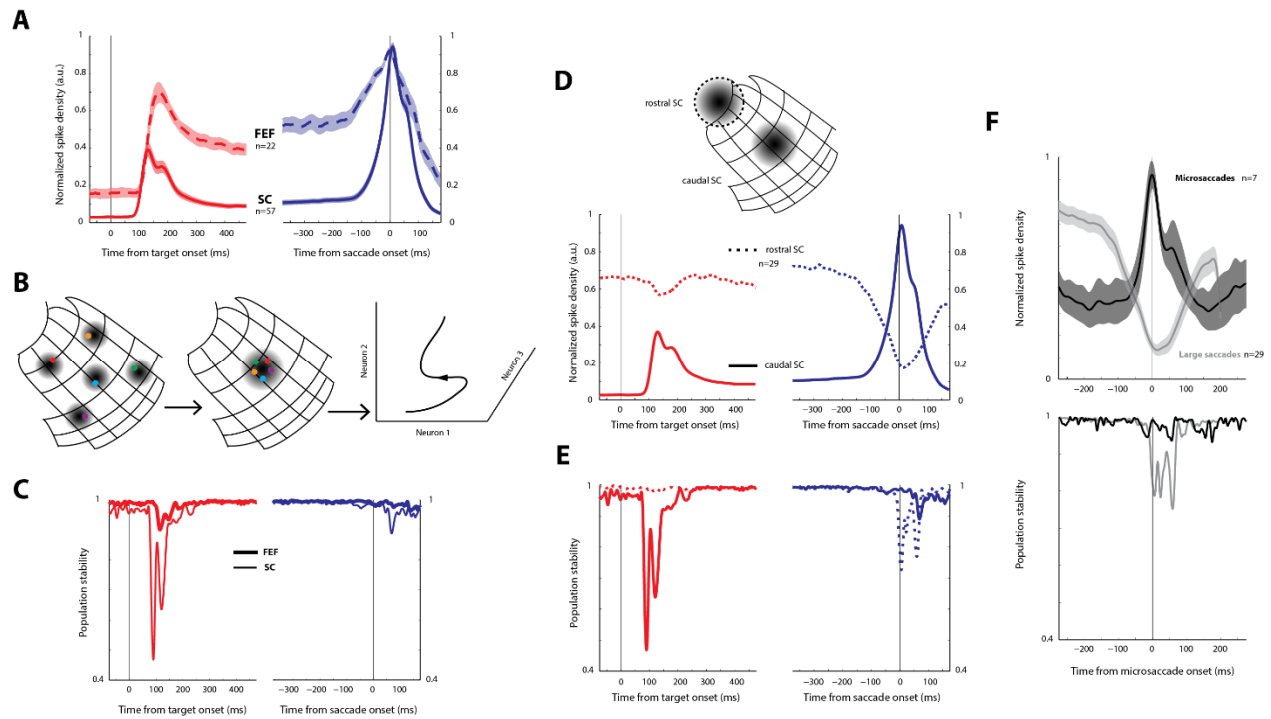

395

396

397 **Figure 2. Temporal stability in sub-populations of SC and FEF.** **A.** Normalized mean population activity of  
 398 visuomovement neurons recorded in SC (solid) and FEF (dashed) during the delayed saccade task. The left and  
 399 right panels show data aligned on target and saccade onsets, respectively. **B.** Inferring population dynamics from  
 400 single-unit recordings. We combined recordings made in different active populations on the SC map (left) into one  
 401 pseudo-population (middle) that is active for any saccade, enabling the construction of an expected population  
 402 trajectory (right) in neural state space (see *Estimating Population Dynamics* in Methods and EDF2 for more details).  
 403 **C.** Temporal stability for the SC (thin traces) and FEF (thick traces) pseudo-populations. Population stability shows a  
 404 drastic reduction at the time of the visual burst but is stable before and during the onset of the movement,  
 405 consistent with the simultaneously recorded population in the previous figure. **D.** Top row - Schematic of the SC  
 406 depicting active population regions in the rostral SC (dotted boundary) and caudal SC (plain). Bottom row – Mean  
 407 normalized activity in rostral (dotted) and caudal (solid) SC neurons during the delayed saccade task. **E.** Temporal  
 408 stability of the rostral SC population (dotted) with the caudal population shown for comparison. **F.** Population  
 409 activity of rostral SC neurons is stable during microsaccades. Top – Normalized population activity of  
 410 microsaccade-related neurons in rostral SC (black). Note the strong burst compared to the suppression in fixation-  
 411 related neurons in the same region for large saccades (gray). Bottom – Temporal stability of the rostral SC  
 412 population for microsaccades shown in comparison to large saccades. Neurons which burst for microsaccades  
 413 remain stable during these fixational eye movements, consistent with the hypothesis that both an increase in firing  
 414 rate and high stability is required for movement generation.

415

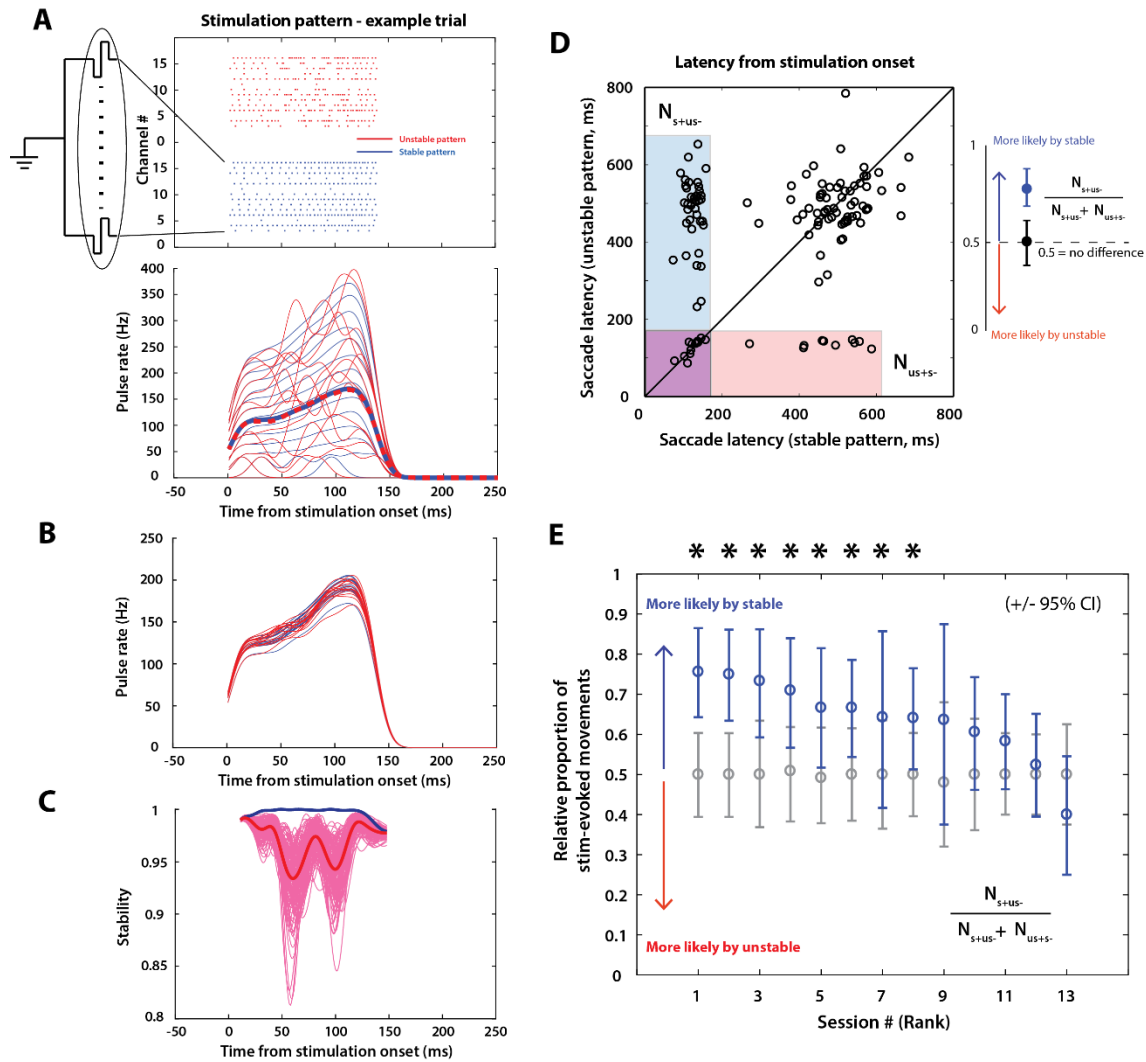

416

417

418 **Figure 3. Patterned microstimulation supports temporal stability as a model of movement initiation.** **A.** Example  
 419 pair of stable-unstable stimulation patterns. Top row – Pulse trains for 14 of 16 channels that were stimulation-  
 420 viable with suprathreshold parameters for this session. Red and blue trains indicate an example pair of unstable  
 421 and stable patterns, respectively. Bottom row – Pulse rates for the 14 channels in the stable-unstable pulse  
 422 patterns, with the population rates averaged across channels overlaid as thick traces. Note that the rates in the  
 423 unstable pattern are highly fluctuating despite the matched population average. **B.** Average pulse rates for each  
 424 channel across all trials for the stable (blue) and unstable (red) patterns used in this session. The clustering of trial-  
 425 averaged rates in a narrow band is the result of randomization of pulse rate assignment to individual channels on  
 426 different trials. **C.** Temporal stability of the stable and unstable patterns (blue and pink, respectively) for all trials in  
 427 the example session. **D.** Scatter plot of saccade latencies (relative to stimulation onset) for the example session.  
 428 Each point reflects the outcome of stimulation with stable and unstable pulse patterns constituting each pair. The  
 429 points in shaded regions are stimulation-evoked for at least one condition.  $N_{S+US-}$  points in the light blue shaded  
 430 box, reflects the number of trials in which a stable stimulation pattern evoked a saccade but its unstable pair did  
 431 not.  $N_{US+S-}$  points in the light red shaded box, denotes the number of trials in which an unstable stimulation pattern  
 432 evoked a saccade but its stable pair did not. Points in the purple box show subset of trials in which both stable and  
 433 unstable pairs evoked a saccade. Points in the unshaded (white) region refer to trials in which neither stable or

434 unstable pair evoked a saccade. For these pairs, the trial was assigned the latency of the saccade (relative to  
435 stimulation onset) directed to a target presented after the gap period. The inset shows the calculation of relative  
436 likelihood of the stable pattern evoking a stimulation-evoked movement for a given session. E. Relative  
437 proportions of the stable pattern evoking a movement for each session (blue points, error bars represent 95% CI of  
438 the bootstrapped distribution). The sessions are sorted in descending order of proportion for viewing clarity. Note  
439 that this sorting order is used in all subsequent figures depicting individual sessions (in Figure 4). Gray points and  
440 error bars are computed from a surrogate dataset in which stable/unstable trial identities are completely shuffled  
441 (mean +/- 95% CI). Asterisks above a particular session denote a significant effect ( $p < 0.01$  on the permutation  
442 test).

443

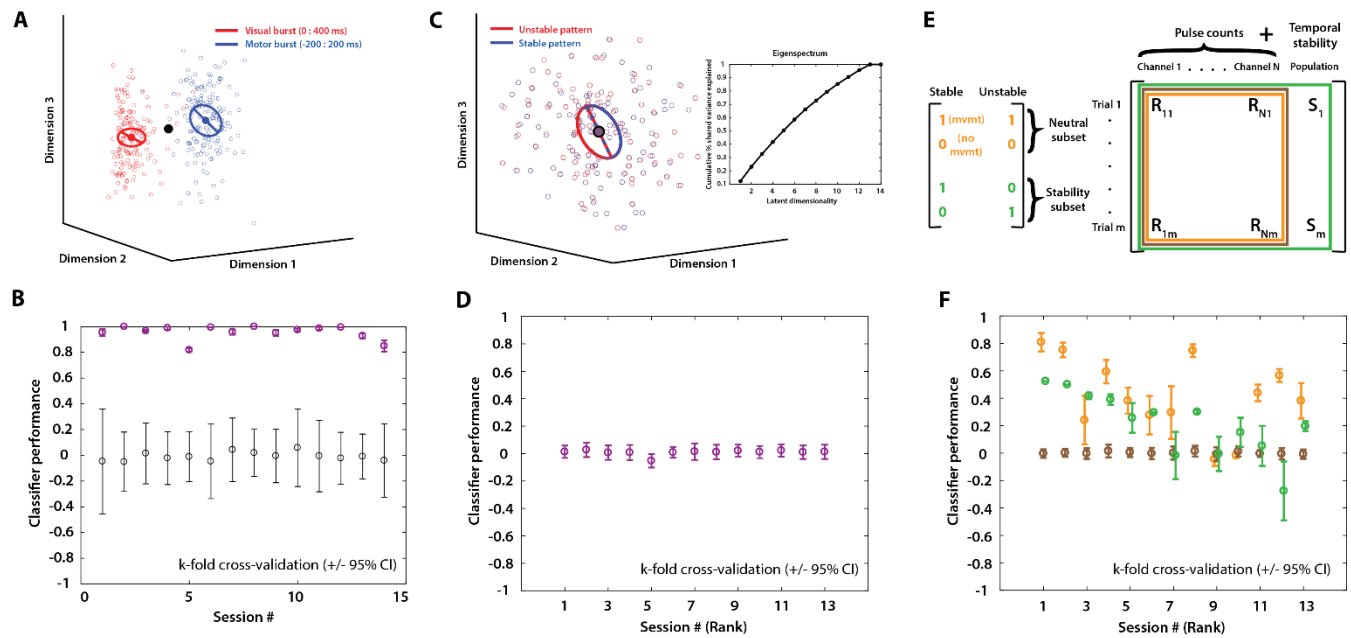

444

445

446 **Figure 4. Linear discriminability of population activity and microstimulation patterns.** **A.** Three-dimensional  
 447 factor analysis (FA) projection of population activity states during the visual and premotor bursts (red and blue  
 448 points, respectively; visual burst: 0 to 400 ms after target onset, premotor burst: -200 to 200 ms around saccade  
 449 onset). The dimensions were chosen arbitrarily to illustrate the separation of the two states. The solid lines and  
 450 ellipses show the axes of maximum variance and covariance ellipses for each cluster, respectively. **B.** Performance  
 451 of a linear discriminant analysis (LDA) classifier on discriminating between visual and premotor states estimated  
 452 using the Matthews correlation coefficient (MCC, chance is 0). The purple points show the mean  $\pm$  95% CI  
 453 computed from k-fold cross-validation on the actual data. The black points show the same but for a shuffled  
 454 dataset in which the visual and premotor labels were randomly permuted, indicating chance performance  
 455 distribution for each dataset. For all sessions, classification performance was significantly above chance ( $p < 0.01$ ,  
 456 one-tailed t-test). These sessions were ordered arbitrarily do not correspond to those associated with patterned  
 457 microstimulation experiments. **C.** Three-dimensional FA projection of population pulse states for stable and  
 458 unstable microstimulation patterns (blue and red points, respectively). The projection dimensions were chosen  
 459 arbitrarily, but no view showed any reasonable separation between the two clusters. The eigenspectrum in the  
 460 inset illustrates the difficulty of choosing a good projection, since all native dimensions contributed equally to the  
 461 variance in the data, due to the randomized assignment of pulse rates to channels across trials. **D.** LDA  
 462 classification performance on discriminating stable and unstable stimulation patterns based on population pulse  
 463 states alone. For all sessions, classification performance was not significantly different from chance ( $p > 0.05$ , two-  
 464 tailed t-test). **E.** Schematic of the approach to partition each dataset for classification of stimulation-evoked  
 465 movement occurrence. Left column - Trial pairs in which both or neither the stable and unstable pattern evoked a  
 466 movement were grouped into the neutral subset, and pairs in which only one of the stable or unstable pattern  
 467 evoked a movement were grouped into the stability subset. Right column - For both subsets, the classifier was first  
 468 trained on pulse counts alone (part of the matrix highlighted by the orange and brown boundaries – match colours  
 469 in next panel). Separately, for the stability subset, the classifier was also trained on an additional dimension of  
 470 temporal stability values (full matrix highlighted by the green boundary). **F.** LDA classification performance on  
 471 discriminating trials in which stimulation evoked a movement from those in which it did not. The orange points  
 472 correspond to the neutral subset, and the green and brown points correspond to the stability subset. The brown  
 473 points are with the classifier trained solely on the population pulse states. The green points are with the addition  
 474 of temporal stability in the input to the classifier. For most sessions, addition of temporal information increased

475 classification performance ( $p < 0.01$ , one-tailed t-test of a difference between the cross-validated performance  
476 distributions with and without addition of temporal stability). In all relevant panels, sessions are sorted by the  
477 order determined in Figure 3E based on relative likelihood of evoking a movement.

478

479

480

481

482

483



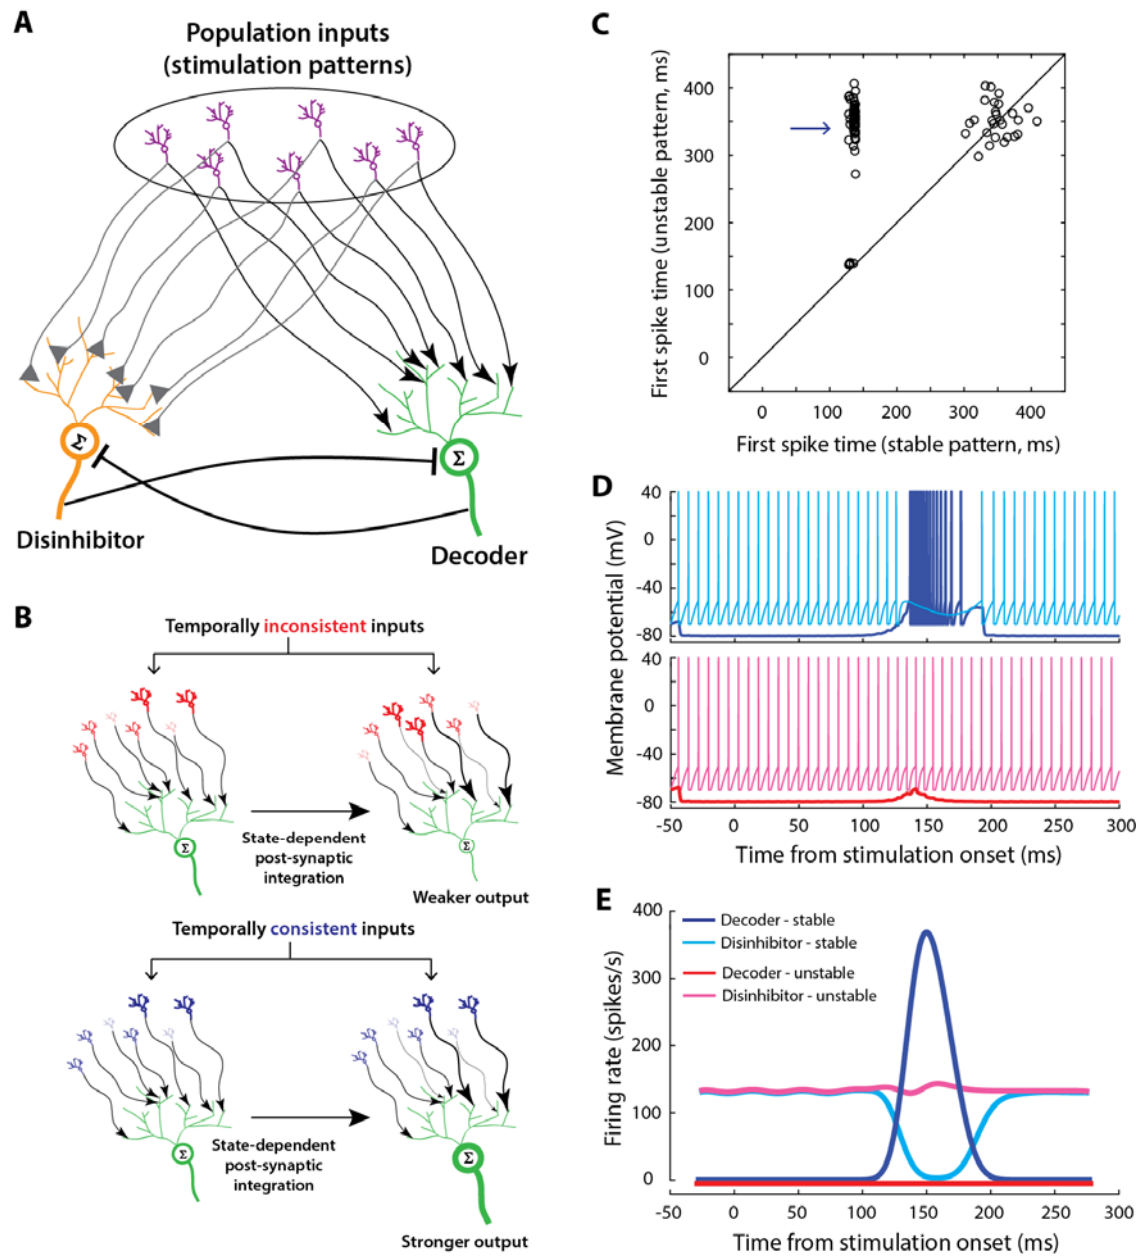

484

485

486 **Figure 5. Spiking neuron model with dendritic processes can discriminate population temporal structure. A.**  
 487 Schematic of the model architecture. The decoder (green neuron), representing high frequency burst neurons in  
 488 the brainstem, receives population inputs (output of purple neurons, or, in this case, microstimulation pulses)  
 489 through its dendritic network (excitatory inputs, represented by the arrowhead terminals). The disinhibitor (orange  
 490 neuron), representing pontine omnipause neurons, also receives inputs from the same population (both excitatory  
 491 and inhibitory<sup>21</sup>, represented by the triangular terminals), in addition to a constant current that produces tonic  
 492 firing activity (not shown). The decoder and disinhibitor are both modelled as leaky integrate-and-fire spiking  
 493 neurons and mutually inhibit each other (flat terminals). **B.** Schematic of the model heuristic. Each input neuron's  
 494 activation level is represented by its size and thickness. The effect of an input spike at the local dendritic site (i.e.,  
 495 excitatory post-synaptic conductance changes) is represented by the thickness of the arrow. Two time points are  
 496 shown for illustration (left column – arbitrary initial point, right column – subsequent time point). In the top row,

497 unstable inputs lead to a scenario where the post-synaptic conductances are no longer aligned to the strong inputs  
498 that initially created them, whereas in the bottom, stable inputs lead to matched strong input and post-synaptic  
499 conductances, resulting in stronger accumulation and firing. **C.** Scatter plot of first spike latencies in the decoder  
500 (putatively representing saccade initiation) for stable versus unstable inputs from matched pairs. The input  
501 duration was 150 ms and thus only latency values <150 ms correspond to actual first spikes produced by the  
502 decoder. To facilitate visualization, latency values were assigned randomly for trials in which the decoder did not  
503 generate any spikes, sampled from a distribution with an arbitrarily selected mean of 350 ms. Note the occurrence  
504 of a number of trial pairs for which only the stable input causes the decoder emit spikes (blue arrow). **D.** Simulated  
505 membrane potential of the decoder (blue and red traces) and disinhibitor (cyan and magenta traces) for an  
506 example matched trial pair with stable (top row) and unstable (bottom row) input patterns. **E.** Average activity of  
507 the disinhibitor (cyan and magenta traces, stable and unstable inputs, respectively) and decoder (blue and red  
508 traces, stable and unstable inputs, respectively) for all trial pairs in which only the stable input produced a  
509 spike/movement (i.e., trial pairs indicated by the arrow in panel D).

510

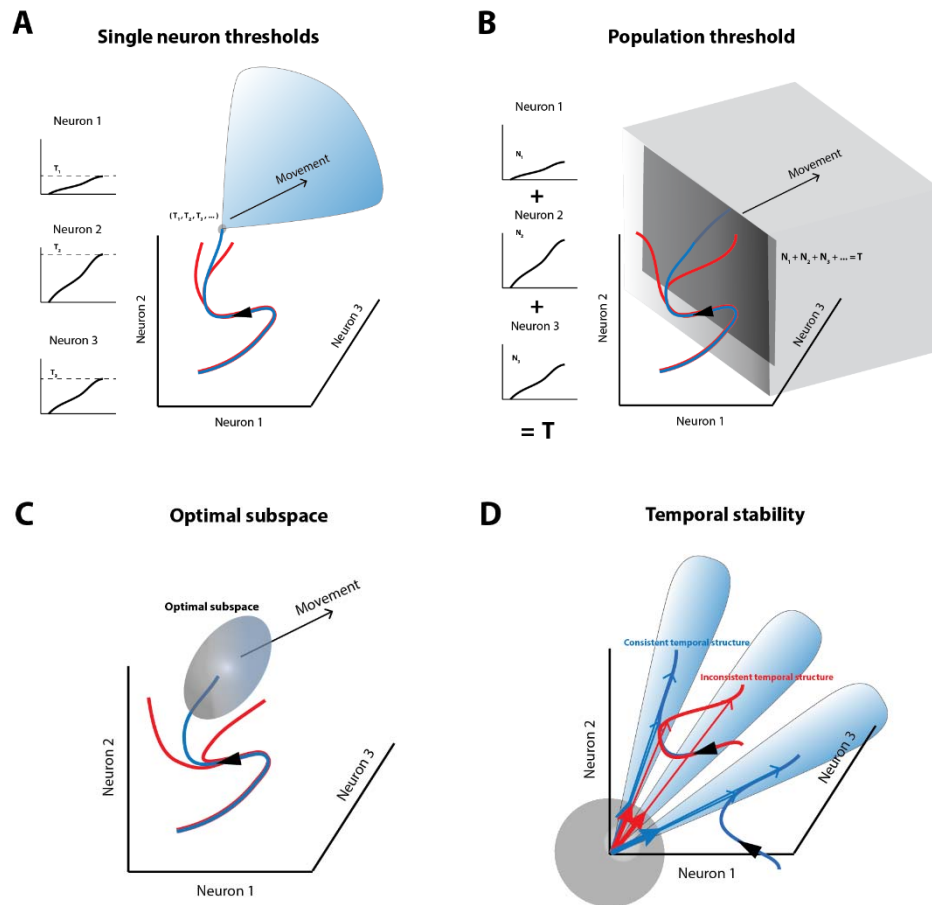

511

512

513 **Figure 6. Summary of models of movement preparation in a state space framework.** A and B. Multi-dimensional  
 514 representations of the threshold hypotheses. Panel A depicts single neuron thresholds, i.e., the activity of each  
 515 neuron must rise to a fixed threshold at the same time in order to initiate a movement. Fixed thresholds for each  
 516 neuron are equivalent to a point (or a small region, represented by the gray sphere) in neural state space. Activity  
 517 profiles that meet this criterion (e.g., blue trajectory) and beyond (blue region) lead to movement generation while  
 518 those that don't meet this criterion (red traces) do not result in a movement. Alternatively, activity may need to  
 519 cross a fixed threshold at the population level (sum of neurons' activities = constant, i.e., an n-1 dimensional  
 520 hyperplane, dark gray plane), depicted in panel B. C. The optimal subspace hypothesis offers more leeway by  
 521 allowing neuronal activity to reach a relatively larger region of population state space (blue trajectory and gray  
 522 ellipsoid) over a period of time in order to signal the initiation of a movement. Activity trajectories that evolve  
 523 outside this "optimal subspace" (red traces) do not lead to a movement. D. The temporal stability hypothesis  
 524 suggests that a burst of neural activity that is consistent over time in state space, i.e., an activity trajectory that  
 525 points in the same direction (blue trajectories and vectors) is likely to be interpreted as a movement command by  
 526 a decoder, while high-frequency activity that is inconsistent (fluctuating directions, red trajectories and arrows) is  
 527 not. It does not matter where in state space the activity happens to evolve – a different subpopulation of neurons  
 528 could be active, but as long as they are pointing in the same direction (i.e., evolving within one of the blue sectors),  
 529 it will lead to a movement. The gray sphere around the origin represents a unit hypersphere for visualization of  
 530 back-projected unit vectors.

531

532

## 533 **Online Methods**

### 534 *General and surgical procedures*

535 All experimental and surgical procedures were approved by the Institutional Animal Care and Use  
536 Committee at the University of Pittsburgh and were in compliance with the US Public Health Service  
537 policy on the humane care and use of laboratory animals. We used three adult rhesus monkeys (*Macaca*  
538 *mulatta*, 2 male, ages 8 and 6, and 1 female, age 10) for our experiments. Both SC and FEF were  
539 recorded in monkeys BB and BL whereas only SC was recorded in monkey WM. Under isoflourane  
540 anaesthesia, recording chambers were secured to the skull over craniotomies that allowed access to the  
541 SC and FEF. In addition, posts for head restraint and scleral search coils to track gaze shifts were  
542 implanted. Post-recovery, the animal was trained to perform standard eye movement tasks for a liquid  
543 reward.

544

### 545 *Visual stimuli and behaviour*

546 Visual stimuli were displayed either by back-projection onto a hemispherical dome or on a LED-backlit  
547 flat screen monitor. Stimuli were white squares on a dark grey background, 4x4 pixels in size and  
548 subtended approximately 0.5° of visual angle. Eye position was recorded using the scleral search coil  
549 technique or using an EyeLink 1000 eye tracker, both sampled at 1 kHz. Stimulus presentation and the  
550 animal's behaviour were under real-time control with a Labview-based controller interface<sup>37</sup>. All  
551 monkeys were trained to perform standard oculomotor tasks. In the delayed saccade task (Figure 1A),  
552 the monkey was required to initiate the trial by acquiring fixation on a central fixation target. Next, a  
553 target appeared in the periphery but the fixation point remained illuminated for a variable 500-1200 ms,  
554 and the animal was required to delay saccade onset until the fixation point was extinguished (GO cue).  
555 The gap task (EDF 4A) was used for the patterned microstimulation experiments. In this task, initial  
556 fixation on a central target was followed by a gap period (200-300 ms) during which the fixation point  
557 disappeared, while the animal was required to maintain fixation at the now vacant location. On  
558 stimulation trials, microstimulation pulses were delivered 100 ms into the gap period and window  
559 constraints were relaxed to allow for the stimulation-evoked movements. This was followed by the  
560 appearance of a saccade target in the periphery which was also the GO cue for the animal to make a  
561 target-directed saccade. All animals performed these tasks with >95% accuracy. Incorrectly performed  
562 trials were removed from further analyses. The tasks were occasionally interleaved with visual search  
563 paradigms used for a different study.

564

### 565 *Experimental sessions*

566 We used data from several different types of sessions in this study. Each session was either a laminar  
567 recording session (n = 16 sessions), a single-unit recording session (n = 108 sessions), or a patterned  
568 microstimulation session (n = 13 sessions). The laminar and single-unit recording sessions employed  
569 mostly the delayed saccade task with a few microstimulation trials to verify electrode presence in SC (or  
570 FEF) and estimate the location on the topographic map. The patterned microstimulation sessions were  
571 restricted to the gap task, with stimulation trials and non-stimulation trials interleaved.

572

573 *Laminar recordings and single-unit electrophysiology*

574 During each laminar recording session, a linear microelectrode array (LMA, AlphaOmega, Inc.) or a  
575 Plexon V-probe (Plexon, Inc.) was inserted into the SC chamber using a hydraulic microdrive. Neural  
576 activity was amplified, digitized and recorded using the Grapevine Neural Interface Processor (Ripple,  
577 Inc.) and visualized using the associated Trellis interface. Neural activity was band-pass filtered between  
578 500 Hz and 5 kHz to record spiking activity and between 0.1-250 Hz to record local field potentials for  
579 another study. Approach towards the SC surface was identified by luminance-based visual modulation of  
580 activity in the lowermost channels, after which the electrode was driven down a further 2-3 mm until  
581 known hallmarks of SC activity were observed in a majority of the channels. The presence of several  
582 contacts in the intermediate layers was further confirmed by the ability to evoke movements with  
583 single-channel microstimulation at these contacts. For single units, a tungsten microelectrode was  
584 lowered into the FEF or SC. Neural activity was amplified and band-pass filtered between 200 Hz and 5  
585 kHz and fed to a digital oscilloscope for visualization and spike discrimination. A window discriminator  
586 was used to threshold and trigger spikes online, and the corresponding spike times were recorded. Both  
587 SC and FEF were confirmed by the presence of visual and movement-related activity as well as the  
588 ability to evoke fixed vector saccadic eye movements at low stimulation currents (20-40  $\mu$ A, 400 Hz, 100  
589 ms). Before beginning data collection for a given neuron or laminar recording site, their response field  
590 was roughly estimated. In most data collection sessions with either electrode, the saccade target was  
591 placed either in the neurons' response field or at the diametrically opposite location in a randomly  
592 interleaved manner. In addition, stimulation-evoked saccades were recorded to identify the response  
593 field centers (or "hotspots") for the cells recorded during that session. For recordings in rostral SC,  
594 stimuli were presented at one of four locations at an eccentricity sufficient to induce a reduction in  
595 activity during the large amplitude saccade.

596

597 *Data analysis and pre-processing*

598 Data were analyzed using a combination of in-house software and Matlab. Eye position signals were  
599 smoothed with a phase-neutral filter and differentiated to obtain velocity traces. Saccades were  
600 detected using standard velocity criteria. The animal was considered to be maintaining fixation if the  
601 gaze remained within a 2-3° window around the fixation target. We also detected any microsaccades  
602 that occurred during the delay period in each trial by using a velocity criterion based on the noise in the  
603 velocity signal for that trial. Only one of the two monkeys (WM) in whom we recorded neural activity in  
604 the rostral SC made sufficient number of microsaccades to permit further analysis.

605 Raw spike density waveforms were computed for each neuron (or multi-unit activity cluster) and each  
606 trial by convolving the spike trains with a Gaussian kernel (width = 4ms; in some instances, we used 10  
607 ms for display purposes only). For the laminar recordings, we analyzed channel activity on single trials  
608 independently. Because direct kernel-based estimation of firing rates from binary spike trains on single  
609 trials can be noisy, we first computed the inverse of the inter-spike intervals as a measure of the firing  
610 rate prior to convolution with the smoothing kernel. All thresholded units were considered for further  
611 analyses, regardless of their characteristics (so number of neurons matched number of channels for  
612 these datasets). For single-electrode recordings, the spike densities were averaged across condition-

613 matched trials (same target location) following alignment with target or saccade onset. Neurons were  
614 classified as visuomovement neurons if the spike density was significantly elevated above baseline  
615 during the visual epoch (50-200 ms following target onset) and during the premotor epoch (50 ms  
616 before and after saccade onset). This resulted in 57 caudal SC neurons and 22 FEF neurons. In addition,  
617 rostral SC neurons were defined as fixation-related if the activity during the premotor epoch of large  
618 saccades was significantly reduced below baseline (29 neurons). A subset of these neurons also  
619 elevated their discharge around the onset of microsaccades (7 neurons). To minimize the effect of noise  
620 in the spike density waveforms due to insufficient number of trials in our analysis, we used only neurons  
621 which had at least 10 trials for a given condition. This was not a factor in most cases (we typically had  
622 50-100 trials).

623

624 *Estimating population dynamics from laminar and single-unit recordings*

625 We define  $\mathbf{R}(t)$  as a population activity vector:

$$\mathbf{R}(t) = \begin{bmatrix} R_1(t) \\ R_2(t) \\ \dots \\ R_n(t) \end{bmatrix}$$

626 where  $\mathbf{R}(t)$  represents the instantaneous activity at time  $t$  as a point in an  $n$ -dimensional space,  $n$  is the  
627 number of neurons, and  $R_i(t)$  is the spike density function of the  $i^{th}$  neuron. The curve connecting  
628 successive points over time is the neural trajectory that describes the evolution of population activity.  
629 For laminar recording data, a neural trajectory was determined for each trial. Analysis of single  
630 electrode data relied on pseudo-population analysis, for which each neuron's firing rate waveform  $R_i(t)$   
631 is the average across many matched trials (identical stimulus/response conditions). Thus, the neural  
632 trajectory is the *expected trajectory* of population activity. Since these neurons have a fairly broad RF,  
633 many neurons contribute to the active population for any given visual stimulus or saccade<sup>38</sup>. Our  
634 neurons were sampled roughly (but not exactly) around the hotspot of the active population for a given  
635 session. Therefore, the pooled data from individual sessions can be thought of as an approximation of  
636 the population mound active for an arbitrary location/RF in the visual field on any given trial. Many  
637 recent studies have reconstructed such "pseudo-populations" from sequentially recorded neurons and  
638 found comparable properties from simultaneous and serial recordings<sup>17,39,40</sup>. Indeed, this is also  
639 expected of our pseudo-population under the assumption of isotropy – that each neuron's contribution  
640 to its respective local active population is similar regardless of the locus of the population, and  
641 consistency between the results we observed in the laminar dataset and pseudo-population confirms  
642 this. To better demonstrate this, we estimated the location of a given neuron in the active pseudo-  
643 population as follows (we use SC for illustrative purposes because of its convenient topography). We  
644 used the point image of the target location on the SC map as a representation of the center of the active  
645 population for that session, and used the stimulation-evoked saccade vector to identify the location of  
646 that neuron on the SC. We referenced the point image of each target location to a single location to  
647 create an active pseudo-population and translated the neuron locations relative to this population  
648 center (EDF 2). All mathematical equations for transforming between visual and SC tissue coordinates  
649 have been defined previously<sup>41</sup>. Inclusion of stimuli/saccades in the anti-preferred RF of the neurons  
650 allowed us to also estimate a pseudo-population of neurons in the ipsilateral SC. To complete the

651 representation of activity across the SC topography, we also recorded from and included in our analyses  
652 neurons in the rostral portion of SC, which are active during fixation<sup>13</sup>, burst during microsaccades<sup>15</sup>, and  
653 are suppressed during large saccades<sup>13</sup>.

654

#### 655 *Temporal stability analysis*

656 To assess temporal stability, we first normalized the population trajectory  $\mathbf{R}(t)$  by its Euclidean norm  
657 ( $\|\mathbf{R}(t)\|$ ), equivalently its magnitude, at each time point to yield  $\hat{\mathbf{R}}(t)$ :

$$\hat{\mathbf{R}}(t) = \frac{\mathbf{R}(t)}{\|\mathbf{R}(t)\|}$$

658 The normalized trajectory can be visualized as a unity length population vector that points in an  $n$ -  
659 dimensional direction at each instant in time. That is, while  $\mathbf{R}(t)$  is free to traverse the  $n$ -dimensional  
660 activity space,  $\hat{\mathbf{R}}(t)$  is constrained to the surface of an  $n$ -dimensional hypersphere (Figure 1D). Temporal  
661 stability or consistency of the evolving population was then quantified by the dot product of two time-  
662 shifted unity length vectors:

663

$$S(t) = \hat{\mathbf{R}}(t - \tau) \cdot \hat{\mathbf{R}}(t + \tau)$$

664 The stability metric ( $S(t)$ ) tracks the running similarity of the normalized trajectory separated in time by  
665  $2\tau$  ms. Crucially, the normalization constrains  $S(t)$  between 0 and 1. Thus, if  $S(t) \rightarrow 1$ , the population  
666 activity is considered stable since the relative contribution of each neuron is consistent. If  $S(t) \ll 1$ , the  
667 population activity is deemed unstable because the relative contribution is variable. If the neural  
668 trajectory is not normalized, the dot product quantifies similarity across the vectors' magnitude and  
669 direction. It roughly mimics the quadratic of the firing rate (exactly so for  $\tau = 0$ ). When the vector  
670 direction remains constant, the dot product yields no additional information than that already present in  
671 the firing rate. In contrast, the normalization scales the neural trajectory so it always has unity  
672 magnitude. It neither alters the relative contributions of the neurons nor compromises the vector  
673 direction. The dot product therefore performs an unbiased evaluation of stability based only on vector  
674 direction and is an estimate of the fidelity of the population code modulo a multiplicative gain factor.  
675 Intuitively, the stability measure is analogous to the correlation between the neurons' activities at two  
676 different time points. We chose the dot product, however, because of its interpretability as a measure  
677 of pattern similarity in  $n$ -dimensional activity space.

678 We assessed the significance of the stability profiles in two ways. First, we compared the average  
679 stability profiles across sessions during the visual response to the premotor epoch (indicated by the  
680 s.e.m. bounds in Figure 1E). Next, for each trial, we randomly shuffled the activities of various neurons  
681 (channels for laminar recordings) at each time point. This shuffle retains the average firing rate at each  
682 instant but removes any temporal correlation in the firing rate across neurons. We performed multiple  
683 such shuffles and re-computed temporal stability for each instance, followed by across-trial averaging,  
684 baseline correction, and across-session averaging to obtain the distribution of stability profiles expected  
685 to occur by chance if the neurons' activities were uncoordinated (gray trace, EDF 1C).

686 To mitigate the effect of potentially variable visual response onset latencies (on different trials) on the  
687 trial- and session-averaged mean temporal stability profiles in the visual epoch, we also performed the

688 averaging after realigning the data to the peak visual response on individual trials (Figure 1F). In order to  
689 do this, the time of peak visual burst was identified from the population mean (average across channels)  
690 firing rate on individual trials and was used to align the traces across trials before computing the trial  
691 average.

692 For the mean-matched control in Figure 1E&F, we performed the temporal stability analysis only on the  
693 subset of trials in which the peak of the population visual response was greater than or equal to the  
694 population activity at the time of saccade initiation, after accounting for an efferent delay. We chose 15  
695 ms before saccade onset as the latest time at which SC activity could influence saccade initiation,  
696 because it is consistent with a range of putative efferent delays reported using various approaches<sup>4,5,42</sup>.

697

### 698 *Patterned microstimulation*

699 The patterned microstimulation experiments allowed us to causally evaluate and compare the temporal  
700 stability model to other models of movement initiation. Given the ability to control the delivery of  
701 individual stimulation pulses to each contact on the laminar electrode, we used stimulation patterns  
702 with specific spatiotemporal features to evaluate their relative efficacy in evoking movements. We  
703 designed these patterns as follows. All individual stimulation pulses were biphasic with a leading  
704 cathodic phase, pulse widths of 250  $\mu$ s, and an interphase interval of 100  $\mu$ s. Our first step was to  
705 determine the appropriate range of current intensities and frequencies for each experiment. During  
706 each session (i.e., for each electrode penetration into SC), we first stimulated from individual contacts  
707 with standard suprathreshold parameters (40  $\mu$ A, 400 Hz) to identify the set of contacts that elicited a  
708 movement. We restricted the experiment to these contacts for the rest of that session. We then  
709 stimulated simultaneously across all these contacts at the same current and frequency, starting from 4  
710  $\mu$ A, 100 Hz, stepping up 1  $\mu$ A and 50 Hz, to determine the threshold for evoking a movement with multi-  
711 channel stimulation. The threshold, defined as the current/frequency combination for which stimulation  
712 generated movements on approximately half the trials, ranged from 5-9  $\mu$ A and 150-200 Hz across  
713 sessions. For each session, we used the metrics of the saccades evoked at these threshold parameters  
714 from constant frequency stimulation in lieu of “fixed vector saccades” as a control against which to  
715 compare the patterned microstimulation results (EDF 5).

716 Once we identified the threshold parameters, we designed stimulation patterns at that current intensity  
717 but with time-varying frequencies intended to simulate a burst of activity. Each stable pattern was  
718 created with a linearly decreasing inter-pulse interval (IPI) sequence for one contact (to simulate a burst)  
719 and scaling the IPIs for other contacts by a uniformly spaced factor. The 150 ms duration burst was  
720 composed of a flat baseline (40 ms), a rising phase (80 ms), and a falling phase (30 ms). The peak  
721 frequency for individual channels ranged uniformly between 20 Hz and 400 Hz with the mean peak  
722 frequency across contacts pegged to the threshold frequency determined from the constant frequency  
723 multi-channel stimulation in an earlier step. At these parameters, stimulation at no individual channel  
724 evoked movements. Each stable stimulation pattern (e.g., blue pulse pattern in Figure 4A) can be  
725 envisioned as a  $n \times m$  matrix, when  $n$  is the contact number and  $m$  is stimulation duration. The matrix  
726 contains ones and zeros, identifying the time of pulse delivered to each contact. To create additional  
727 realizations of the stable stimulation patterns (e.g., blue pulse patterns in EDF 4B & C), the assignment  
728 of specific peak frequencies to individual channels was randomly shuffled across trials.



729 For each stable stimulation pattern, we created a corresponding unstable pattern/pair by jittering  
730 stimulation pulses within a 20 ms window for each channel and randomly shuffling pulses across  
731 channels (e.g., red pulse patterns in Figure 1A and EDF 4B & C). This step created instability in the  
732 population pulse pattern by destroying the relative scaling of pulse rates across neurons while also  
733 ensuring that both total pulse counts per channel and the mean instantaneous pulse rates across  
734 channels were preserved between the stable and unstable patterns. Thus, all subsequent analyses were  
735 performed on pairs of trials with stable and unstable stimulation patterns matched in these aspects. We  
736 also ensured that the inter-pulse interval was never less than 2 ms (i.e., the peak frequency never  
737 exceeded 500 ms) for any stimulation train. The stimulation patterns were generated offline and the  
738 pattern trains corresponding to each trial were introduced 100 ms into the gap period in a gap task.  
739 Stable-unstable pairs were randomly interleaved within a block in which roughly 80% of all trials were  
740 stimulation trials.

741 We used the latency of the first saccade after stimulation onset but before stimulation offset as an  
742 indicator of the occurrence of a stimulation-evoked saccade (Figure 3D); such saccades exhibited  
743 latencies <150 ms. If the microstimulation was ineffective at evoking a saccade, the first movement was  
744 typically directed to the target presented after the gap period ended; in such cases, the saccade was  
745 produced >400 ms after stimulation onset. We estimated the relative likelihood of evoking a movement  
746 by examining trials in which only one of the stable or unstable pulse patterns in a pair yielded a  
747 stimulation-evoked saccade (also see Figure 4E and next section). This was quantified based on the  
748 number of trials pairs in which only the stable pattern evoked a movement during the window of  
749 stimulation ( $= N_{s+us-}$ , number of points in the blue shaded region in Figure 3D) and the number of trial  
750 pairs in which only the unstable pattern evoked a movement ( $= N_{us+s-}$ , number of points in the red  
751 shaded region in Figure 3D). The relative likelihood of evoking a movement with the stable pattern was  
752 defined as

753 
$$RL_s = \frac{N_{s+us-}}{N_{s+us-} + N_{us+s-}}.$$

754  $RL_s$  ranges from 0 to 1 and is symmetric with a neutral value of 0.5. To estimate the significance of this  
755 estimate, we performed permutation tests with respect to a surrogate dataset in which trials were  
756 randomly assigned stable/unstable labels. This lowered the expected estimate of relative likelihood to  
757 purely chance levels (Figure 3E).

758

### 759 *Discriminability of population patterns – neural activity and microstimulation*

760 To determine whether the visual and premotor bursts are discriminable using static, non-temporal  
761 features of population activity, we performed factor analysis (FA) on 400 ms snippets of activity from  
762 these two epochs (visual epoch: 0-400 ms from target onset, motor epoch: -200:200 ms relative to  
763 saccade onset). We used DataHigh<sup>19</sup>, a dimensionality reduction and visualization toolbox written in  
764 Matlab, to perform FA on the 16- or 24-dimensional laminar recordings and visualize the projections  
765 onto the top latent dimensions. The top 3 dimensions accounted for >95% of the variance in neural  
766 states for all our datasets (eigenspectrum not shown), and a 3-dimensional projection is shown for an  
767 example dataset in Figure 4A, with the visual and premotor snippets coded in different colours. We also  
768 performed FA on the microstimulation patterns (the “states” were computed across the entire 150-ms

769 stimulation duration). Almost all dimensions were needed to account for >95% of the variance in the  
770 stimulation patterns (eigenspectrum inset in Figure 4C), owing to the randomized assignment of  
771 frequencies across contacts on different trials. Thus, we chose an arbitrary 3-dimensional projection for  
772 visualization in Figure 4C; however, note that the qualitative result did not depend on the projection.  
773 Since we used this step purely for visualization, we did not perform any subsequent analysis on the  
774 estimated FA dimensions.

775 Next, we used a linear discriminant analysis (Fisher's LDA)<sup>43</sup> to assess a decoder's ability to discern  
776 whether its inputs signify a movement command at the population level, based on static population  
777 features alone, and how this discriminability relates to temporal stability. We first trained a binary LDA  
778 classifier on the visual and premotor snippets described above in the native neural space. LDA finds a  
779 projection defined by a hyperplane that maximizes the separation between the two classes:

$$780 \quad \mathbf{w} \propto \Sigma^{-1}(\boldsymbol{\mu}_1 - \boldsymbol{\mu}_0),$$

781 where the vector  $\mathbf{w}$  is normal to the hyperplane defining the class boundary,  $\Sigma = \frac{n_0 \Sigma_0 + n_1 \Sigma_1}{n_0 + n_1}$ , the pooled  
782 covariance matrix derived from the within-class covariance matrices  $\Sigma_0$  and  $\Sigma_1$ ,  $n_0$  and  $n_1$  are class  
783 occupancies, and  $\boldsymbol{\mu}_0$  and  $\boldsymbol{\mu}_1$  are the class means. We subjected the linear scores

$$784 \quad s_i = \mathbf{w} \cdot (\mathbf{x} - \frac{\boldsymbol{\mu}_i}{2})$$

785 obtained from the LDA projections to a softmax transformation to compute class probabilities:

$$P(\mathbf{x} \in i) = \frac{e^{s_i}}{\sum_i e^{s_i}}$$

786 In all cases, we used  $k$ -fold crossvalidation to test LDA performance (on the classification of visual and  
787 premotor population states, and on stimulation patterns described below), with the choice of  $k$  dictated  
788 by the total number of trials in the dataset such that each fold (test set) had at least 10 trials. We  
789 quantified classifier performance using the Matthews Correlation Coefficient (MCC)<sup>44</sup>, since accuracy  
790 can be significantly biased and have high variance for classification problems with unequal number of  
791 training or test points<sup>45</sup>, which was the case with the stimulation patterns below. Instead, MCC takes the  
792 complete confusion matrix into account to quantify binary classifier performance as:

$$793 \quad \text{MCC} = \frac{N_{00}N_{11} - N_{01}N_{10}}{\sqrt{(N_{00} + N_{01})(N_{00} + N_{10})(N_{11} + N_{01})(N_{11} + N_{10})}},$$

794 where  $N_{ij}$  represents the number of instances where a trial in class  $i$  is classified to be in class  $j$  in the  
795 classification confusion matrix. Similar to a standard correlation coefficient, MCC values range from -1 to  
796 1 (-1, 0, and 1 respectively indicate poor, average, and perfect classification).

797 To evaluate the discriminability of microstimulation patterns, we split each dataset in 3 different ways.  
798 The first split was based on the predefined stable-unstable pattern pairs and was used to classify pulse  
799 patterns as stable or unstable based on their population states alone (Figure 4D). The next two splits  
800 were used to classify stimulation patterns as movement-evoking or non-evoking, in order to identify  
801 other features of the stimulation patterns that potentially could have impacted movement occurrence.  
802 We split the stable-unstable trial pairs into two subsets – the neutral subset (NS), which was made up of  
803 trial pairs where either both or neither pattern in the stable-unstable pair evoked a movement, and the

804 stability subset (SS), made up of trial pairs where only one of the stable-unstable pair evoked a  
805 movement (Figure 4E). The rationale was that a classifier trained on NS must identify features *other* than  
806 temporal stability in order to classify a trial as (stimulation-evoked) movement or non-movement  
807 because of the matched numbers of stable-unstable trials regardless of movement evoked. On the other  
808 hand, a classifier trained on SS may potentially be able to identify temporal stability as a predictor  
809 because of the differential relationship between stability and movement occurrence. We further  
810 evaluated whether a dynamic feature of population activity such as temporal stability can be utilized for  
811 classification based on population states alone, by re-training the classifier with explicit addition of  
812 temporal stability as an input dimension and comparing it with the performance of one without this  
813 addition.

814

### 815 *Correlation analysis*

816 In order to compare against pooled accumulator mechanisms<sup>20</sup>, we estimated the correlation structure  
817 in our population of neurons and microstimulation patterns. We first computed the spike count  
818 correlation across trials for every pair of neurons (or multi-unit clusters,  $n = 1963$  pairs) during the visual  
819 and motor epochs as defined above. For the microstimulation patterns, we computed the pulse count  
820 correlations for every pair of stimulation channels ( $n = 899$  pairs) during the stimulation window for the  
821 stable and unstable patterns separately. Note that in this case, pulse count correlation is equivalent to  
822 computing the correlation between accumulation rates (and therefore directly comparable to the  
823 accumulator mechanism mentioned above), since the duration of stimulation was fixed and the baseline  
824 and peak rates were matched between the stable and unstable conditions.

825

### 826 *Spiking neuron model*

827 We developed a biophysically realistic computational model with spiking neurons to discriminate and  
828 read out temporal structure in population activity. The core component of the model was a recurrently  
829 connected module comprising a decoder element and a disinhibitor element, putatively representing  
830 pontine high-frequency burst neurons and OPNs, respectively<sup>25</sup>. The decoder and disinhibitor were both  
831 modelled as leaky integrate-and-fire (LIF) spiking neurons:

$$\tau_m \frac{dV_{neu}}{dt} = -(V_{neu}(t) - V_{rest}) + R_m I_{neu}(t)$$

832 where  $V_{neu}(t)$  is the membrane potential of the neuron,  $V_{rest}$  is the resting potential,  $\tau_m$  is the  
833 membrane time constant,  $R_m$  is the membrane resistance,  $I_{neu}(t)$  is the net time-varying input to the  
834 neuron, and *neu* represents the decoder (*dec*) or disinhibitor (*dis*). The spiking followed standard  
835 threshold crossing rules, i.e., if  $V_{neu}(t = t^k) > V_{th}$ , where  $V_{th}$  represents the action potential  
836 threshold, the membrane potential was reset to  $V_{neu}(t = t^k) \equiv V_{reset}$ , and the neuron's spike times  
837  $[t^i]$  were updated with the  $k^{th}$  spike time  $t^k$ .

838 The current input to both the decoder and disinhibitor was composed of excitatory and inhibitory  
839 components:

$$I_{neu}(t) = G_{neu}^{exc}(t)(E_{exc} - V_{neu}(t)) + G_{neu}^{inh}(t)(E_{inh} - V_{neu}(t)) + I_{neu}^0$$

840 where  $G_{neu}^{exc}(t)$  and  $G_{neu}^{inh}(t)$  are the respective net excitatory and inhibitory post-synaptic conductances,  
 841 and  $E_{exc}$  and  $E_{inh}$  are the excitatory and inhibitory reversal potentials representing the contribution of  
 842 AMPA and GABA channels, respectively.  $I_{neu}^0$  is a constant current term that was set to zero for the  
 843 decoder and to a fixed value of 4 for the disinhibitor in order to simulate tonic firing without external  
 844 input.

845 The decoder received excitatory inputs from the SC in the form of stimulation pulse trains, and  
 846 inhibitory input from the disinhibitor. The disinhibitor received both excitatory and inhibitory inputs  
 847 from the SC and reciprocal inhibition from the decoder<sup>21</sup>. The net time-varying conductances were  
 848 modelled as follows:

$$849 \quad G_{dec}^{exc}(t) = \sum_{i=1}^N w_i^{exc-dec} g_i(t), \text{ and } g_i(t) = \sum_{k=1}^{n_i} \epsilon(t - t^k) (1 + g_i(t^k)),$$

$$850 \quad G_{dec}^{inh}(t) = w^{dis-dec} \sum_{k=1}^{n_{dis}} \epsilon(t - t^k),$$

$$851 \quad G_{dis}^{exc}(t) = \sum_{i=1}^N w_i^{exc-dis} g_i(t), \text{ and } g_i(t) = \sum_{k=1}^{n_i} \epsilon(t - t^k) (1 + g_i(t^k)),$$

$$852 \quad G_{dis}^{inh}(t) = w^{dec-dis} \sum_{k=1}^{n_{dec}} \epsilon(t - t^k) + \sum_{i=1}^N w_i^{inh-dis} g_i(t), \text{ and } g_i(t) = \sum_{k=1}^{n_i} \epsilon(t - t^k) (1 + g_i(t^k)).$$

853 In each equation they appear,  $N$  is the number of input units (i.e., number of channels with pulse trains),  
 854  $w_i^{exc/inh-neu}$  is the excitatory/inhibitory weight from the  $i^{th}$  input unit to the spiking neuron,  $n_i$  is the  
 855 number of pulses in the  $i^{th}$  input unit,  $w^{dis-dec}$  is the weight from the disinhibitor to the decoder,  
 856  $w^{dec-dis}$  is the weight from the decoder to the disinhibitor, and  $t^k$  is the time of the  $k^{th}$  input pulse or  
 857 output spike (depending on which summation term it appears in). The  $g_i$  term, when it appears in the  
 858 sum that produces  $g_i$  (as in all but the second conductance equation), represents the state-dependent  
 859 influence of each incoming pulse input.  $\epsilon(t)$  is the post-synaptic conductance kernel defined as:

$$\epsilon(t - t^k) = \begin{cases} -e^{-\frac{t}{\tau_1}} + e^{-\frac{t}{\tau_2}} & \text{if } t > t^k, \\ 0 & \text{if } t < t^k \end{cases},$$

860 The conductance and input current terms that were dependent solely on the pulse input patterns were  
 861 pre-computed and fed into a Eulerian solver (time step = 0.1 ms) for the differential equations governing  
 862 the membrane potential of the spiking decoder and disinhibitor units. Extended Data Table 1 shows the  
 863 values of the parameters and constants used for the model simulations.

864

865 **Extended Data Figures**

866

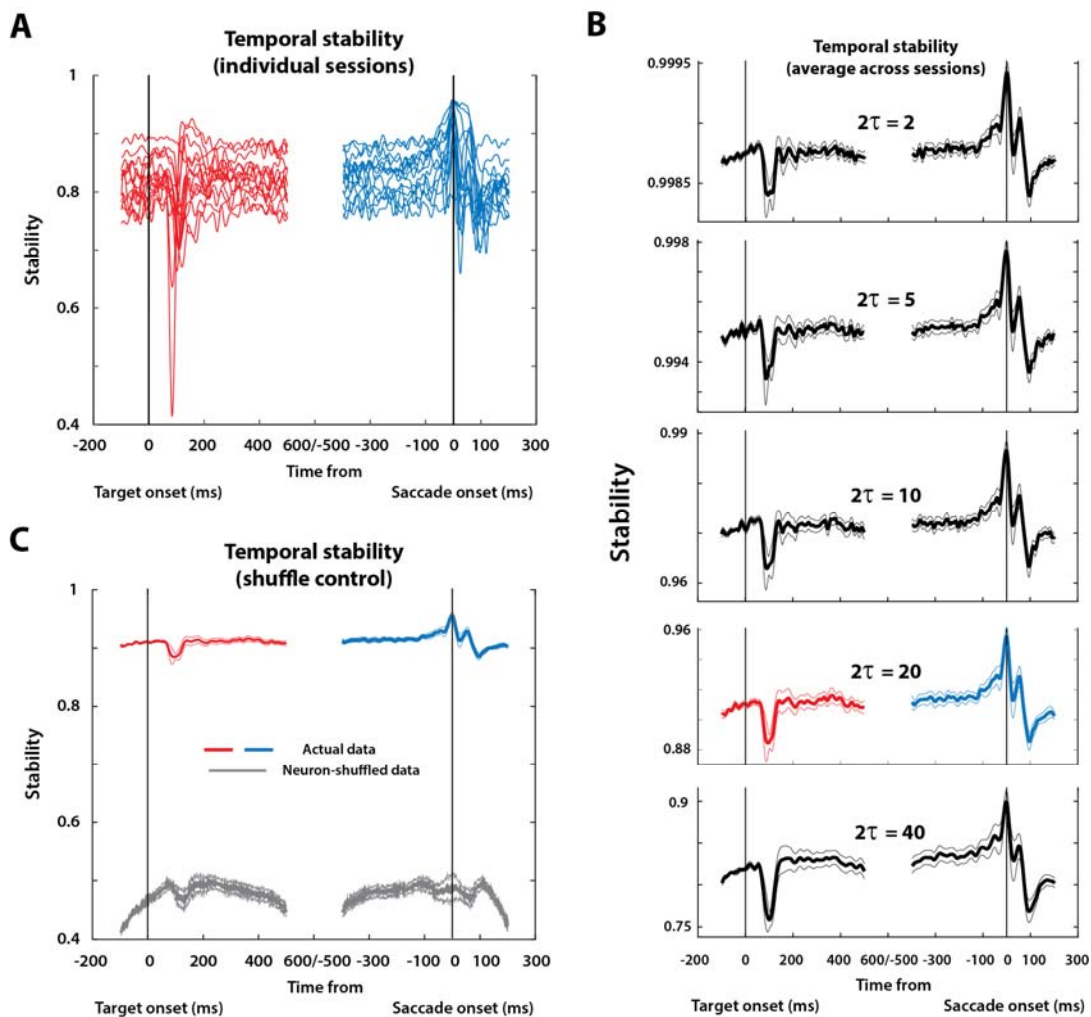

867

868 **Extended Data Figure 1. Temporal stability profiles within and across sessions collected with laminar probe. A.**  
869 Temporal stability averaged across trials for individual sessions (thin traces) have different baselines, possibly due  
870 to varying noise levels, spike isolation differences, etc. The baselines were shifted to their mean level before  
871 averaging across sessions in Figure 1. **B.** In order to ensure that the choice of  $\tau$  did not have an undue effect on our  
872 results, we computed stability for several values of  $\tau$ . The panels show temporal stability profiles for (from top to  
873 bottom),  $\tau = 1, 2.5, 5, 10,$  and  $20$ , respectively. The coloured traces for  $\tau = 10$  are the ones shown in the main Figure  
874 1. As evident, the absolute magnitude of stability was inversely related to  $\tau$ , a consequence of the smooth and  
875 continuous nature of the trajectory. In other words, since the state of the neural population evolves smoothly, it  
876 must traverse intermediate states in order to move from one state to another, resulting in greater similarity  
877 between state vectors close together in time than those further apart. However, the relative shape of stability  
878 profile was largely preserved across  $\tau$ . Thus, the relative instability during the visual epoch and stability during the  
879 premotor epoch persists across a broad range of time separations. **C.** Temporal stability averaged across sessions  
880 for shuffled data (gray traces, mean  $\pm$  s.e.m.). For each trial in each session's dataset, the activities of neurons  
881 were shuffled at each time point so that the instantaneous population average was preserved. The coloured traces  
882 show the stability profiles for actual data from Figure 1E.

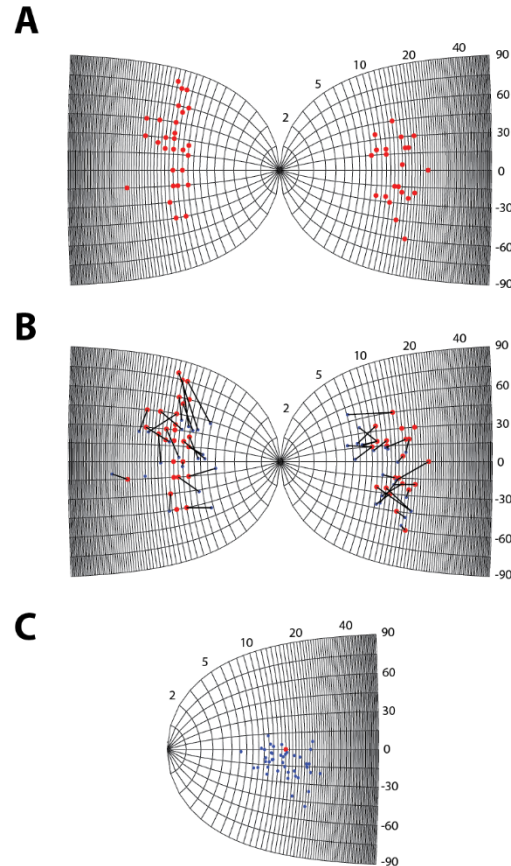

883

884 **Extended Data Figure 2. Inferring population dynamics from single-unit recordings.** **A.** Point images (red) of  
885 target locations on the SC map across all experimental sessions. The locations on the SC were computed using  
886 known transformations between visual space and SC tissue coordinates (see Methods). **B.** Same as in A, with the  
887 endpoint of the stimulation-evoked saccade vector at the recording site shown in blue. The stimulation vector  
888 provides a proxy for the RF center of the recorded neuron. Neuron-target pairs (blue-red) from individual sessions  
889 are connected using black lines (unconnected points did not have the corresponding stimulation/target data). **C.**  
890 The active pseudo-population on the SC map. The red locations from A and B were referenced to one arbitrarily  
891 selected location on the SC map (here,  $R=15$ ,  $\theta=0$ ) and the blue locations appropriately translated. Points  
892 from both colliculi are shown on a single SC for the sake of clarity.

893

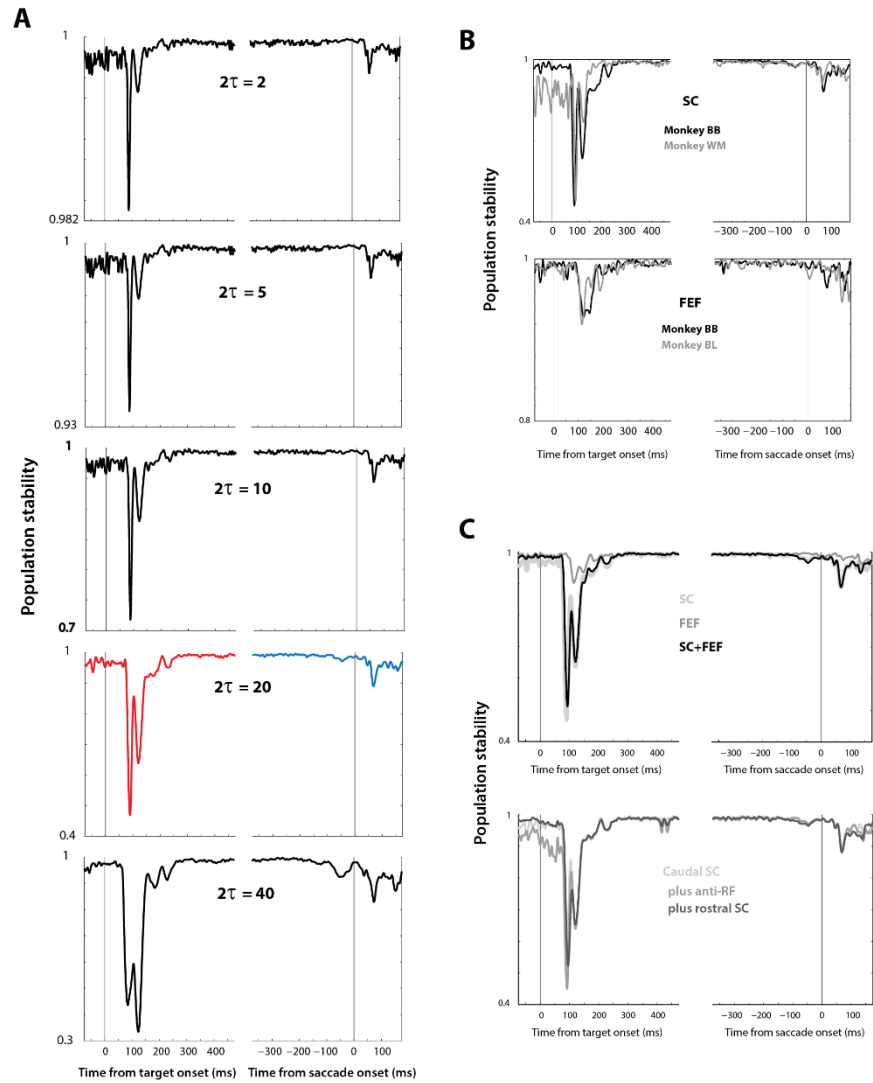

894

895 **Extended Data Figure 3. Temporal stability profiles based on pseudo-population analyses.** A. Effect of  $\tau$  on  
896 temporal stability for the pseudo-population data (similar to EDF 1B). B. Temporal stability profiles in SC and FEF  
897 for individual subjects are qualitatively similar to the combined result in Figure 2C. C. Temporal stability profiles of  
898 various combinations of pseudo-populations.

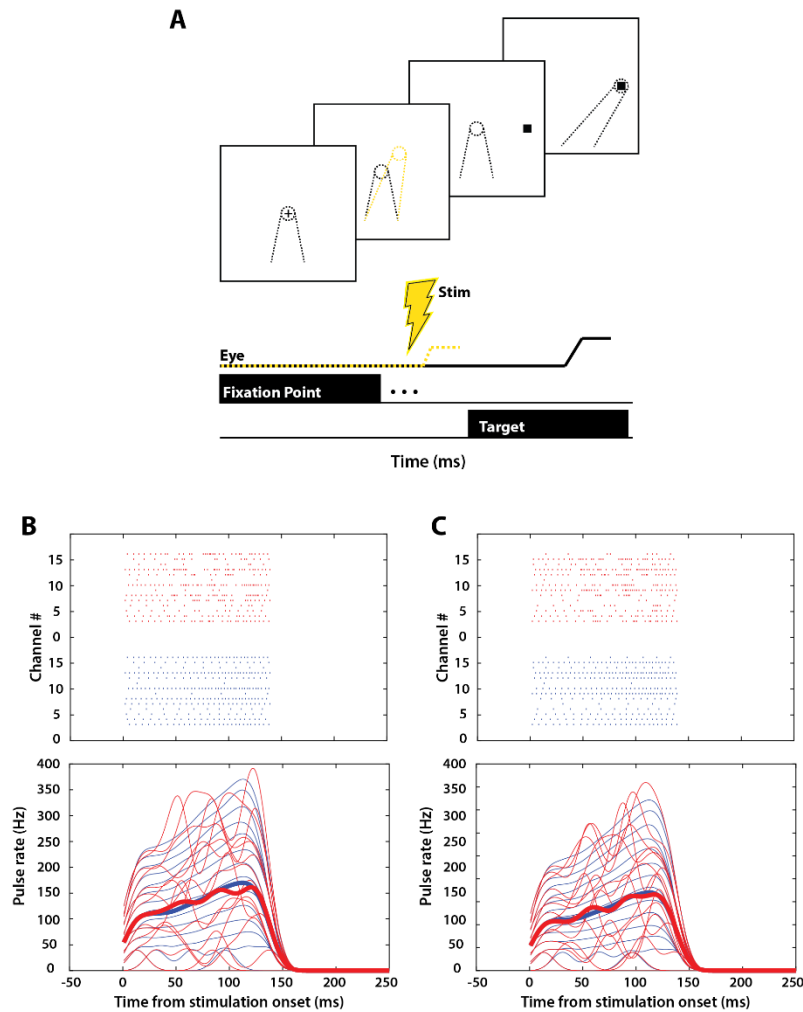

899

900 **Extended Data Figure 4. Task and pulse pattern configurations for microstimulation experiments.** A. Schematic  
901 of the gap task used in the patterned microstimulation experiments. B and C. Two more examples of pulse rasters  
902 and pulse rates for individual channels for stable (blue) and unstable (red) pairs of stimulation patterns (see Figure  
903 3A).

904



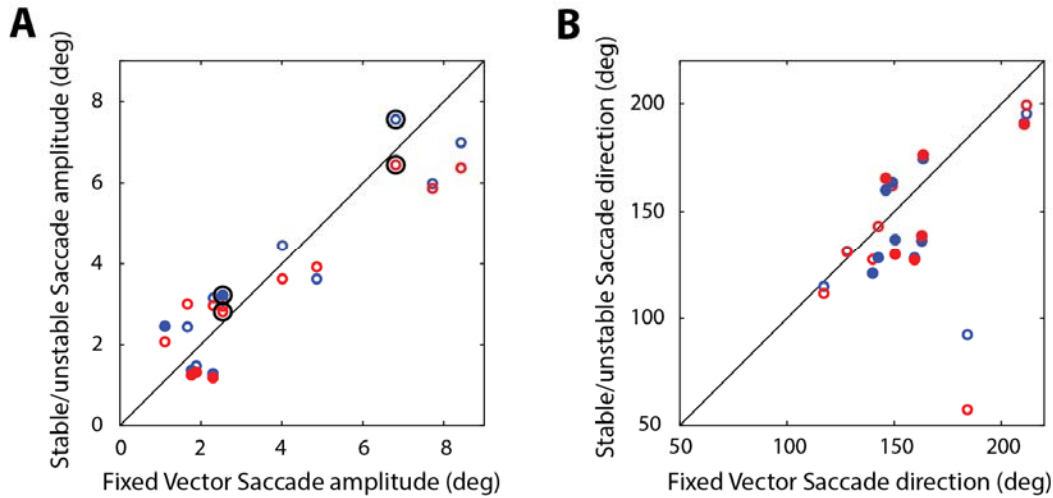

905

906 **Extended Data Figure 5. Features of saccade vectors evoked by stable and unstable pulse patterns. A.** Mean  
907 stimulation-evoked saccade amplitude for stable (blue points) and unstable (red points) stimulation patterns  
908 plotted against the fixed vector saccade amplitude obtained from near-threshold constant frequency stimulation  
909 (see Methods). Each point represents one session for that condition. The diagonal represents the unity  
910 relationship. Filled circles denote a significant difference of the stable/unstable saccade amplitude from the fixed  
911 vector saccade ( $p < 0.01$ , Wilcoxon rank-sum test). Points circumscribed by black circles denote sessions where the  
912 saccade amplitudes on stable and unstable trials were significantly different from each other ( $p < 0.01$ , Wilcoxon  
913 signed-rank test). **B.** Similar to A (including criteria for statistical significance), but for stimulation-evoked saccade  
914 direction.

915

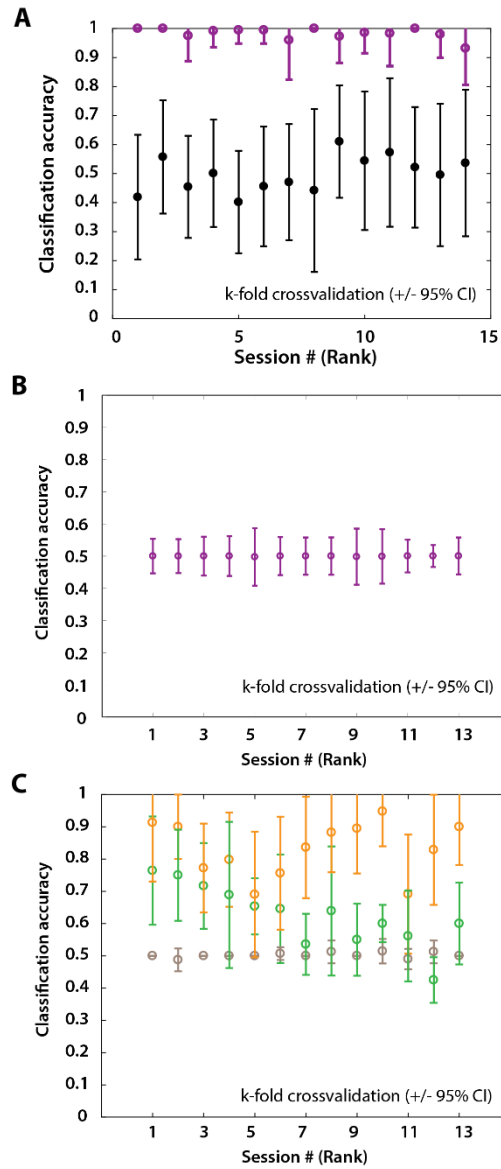

916

917 **Extended Data Figure 6. Linear discriminability of population activity and microstimulation patterns. A-C.** Similar  
918 to panels B, D, and F, respectively, from Figure 4, but for uncorrected classification percentage accuracy instead of  
919 Matthews correlation coefficient (MCC).

920

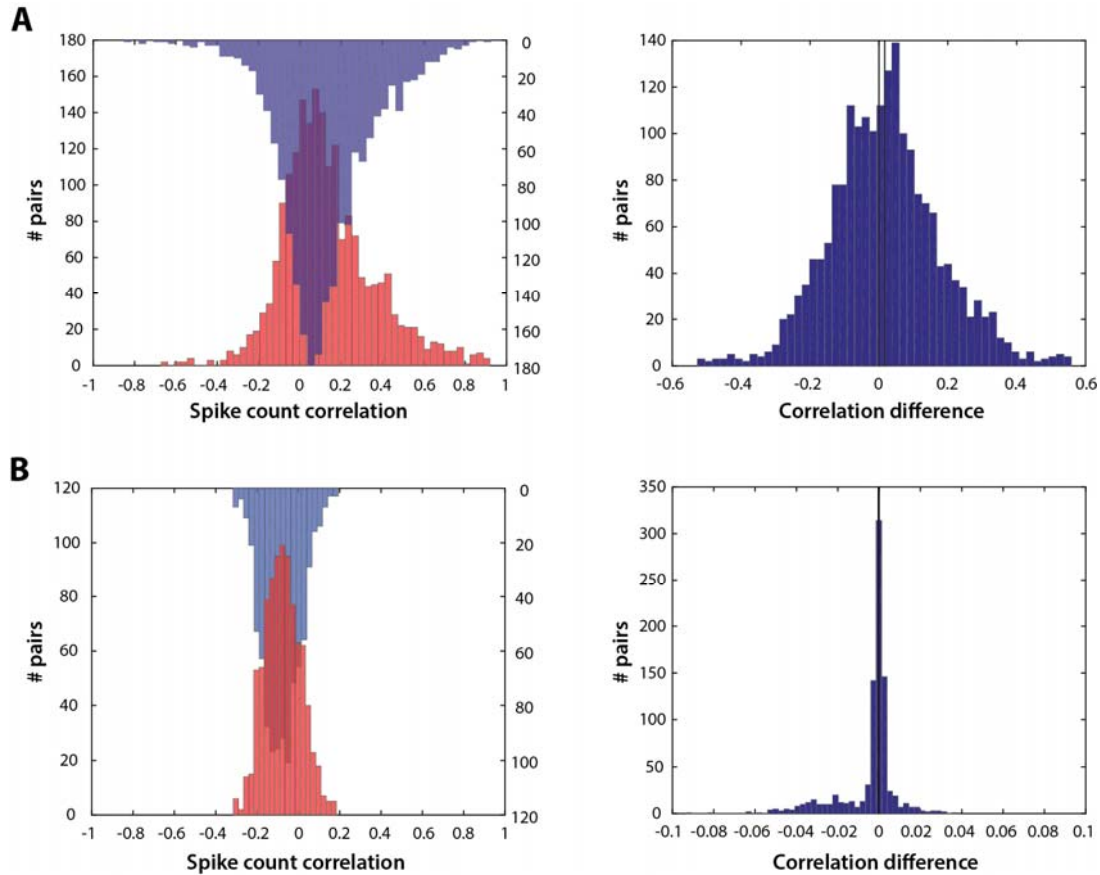

921

922 **Extended Data Figure 7. Across-trial spike and pulse count correlations.** A. Left: Histograms of spike count  
923 correlations for all pairs of channels (n = 1963) for the visual and premotor epochs (red and blue histograms,  
924 respectively). One of the histograms is shown inverted for the sake of clarity. Right: Distribution of differences  
925 between visual and premotor epoch correlations computed for each pair. The two vertical lines represent zero and  
926 the mean of the distribution (left and right lines, respectively). B. Same as A for pulse counts correlations for all  
927 pairs of stimulation channels (n = 899) for the stable (blue) and unstable (red) patterns, with the corresponding  
928 difference histogram shown on the right.

929

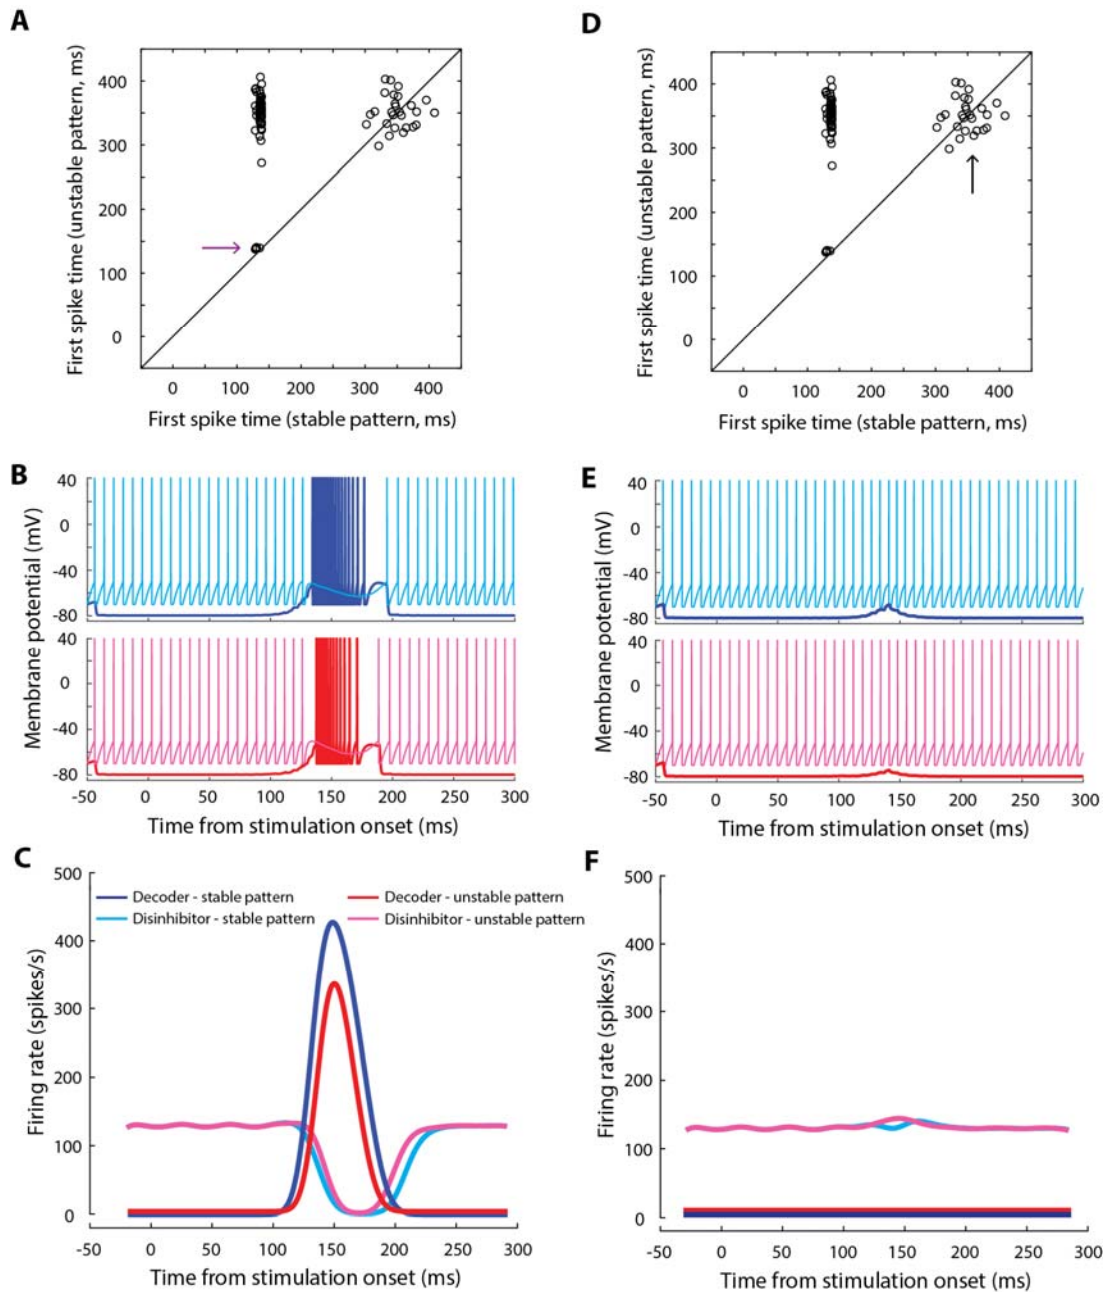

930

931 **Extended Data Figure 8. Performance of spiking neuron model for various simulation outcomes with stable and**  
 932 **unstable pulse patterns. A.** Scatter plot of first spike latencies in the decoder (putatively representing saccade  
 933 initiation) for stable versus unstable inputs from matched pairs (same as Figure 5C). The next two panels are based  
 934 on the trial pairs highlighted by the arrow (in which both stable and unstable patterns produced a saccade). **B.**  
 935 Simulated membrane potential of the decoder (blue and red traces) and disinhibitor (cyan and magenta traces) for  
 936 an example matched trial pair from the subset in panel A, for stable (top row) and unstable (bottom row) input  
 937 patterns. **E.** Average activity of the disinhibitor (cyan and magenta traces, stable and unstable inputs, respectively)  
 938 and decoder (blue and red traces, stable and unstable inputs, respectively) for all trial pairs in which both stable  
 939 and unstable input patterns produced a movement. **D.** Same as panel A, except for the focus on trial pairs (arrow).  
 940 The next two panels are based on the trial pairs in which neither stable nor unstable patterns produced a saccade.  
 941 **E.** Simulated membrane potential of the decoder and disinhibitor for an example matched trial pair from the

942 subset in panel D. Layout and colour scheme as in panel B. **F.** Average activity of the disinhibitor and decoder for all  
943 trial pairs in which neither stable nor unstable input patterns produced a movement. Colour scheme as in panel C.  
944 Note the small increase in disinhibitor activity around the time when a movement would have normally occurred,  
945 reminiscent of the slight increase in OPN activity during visual input<sup>26</sup>.  
946

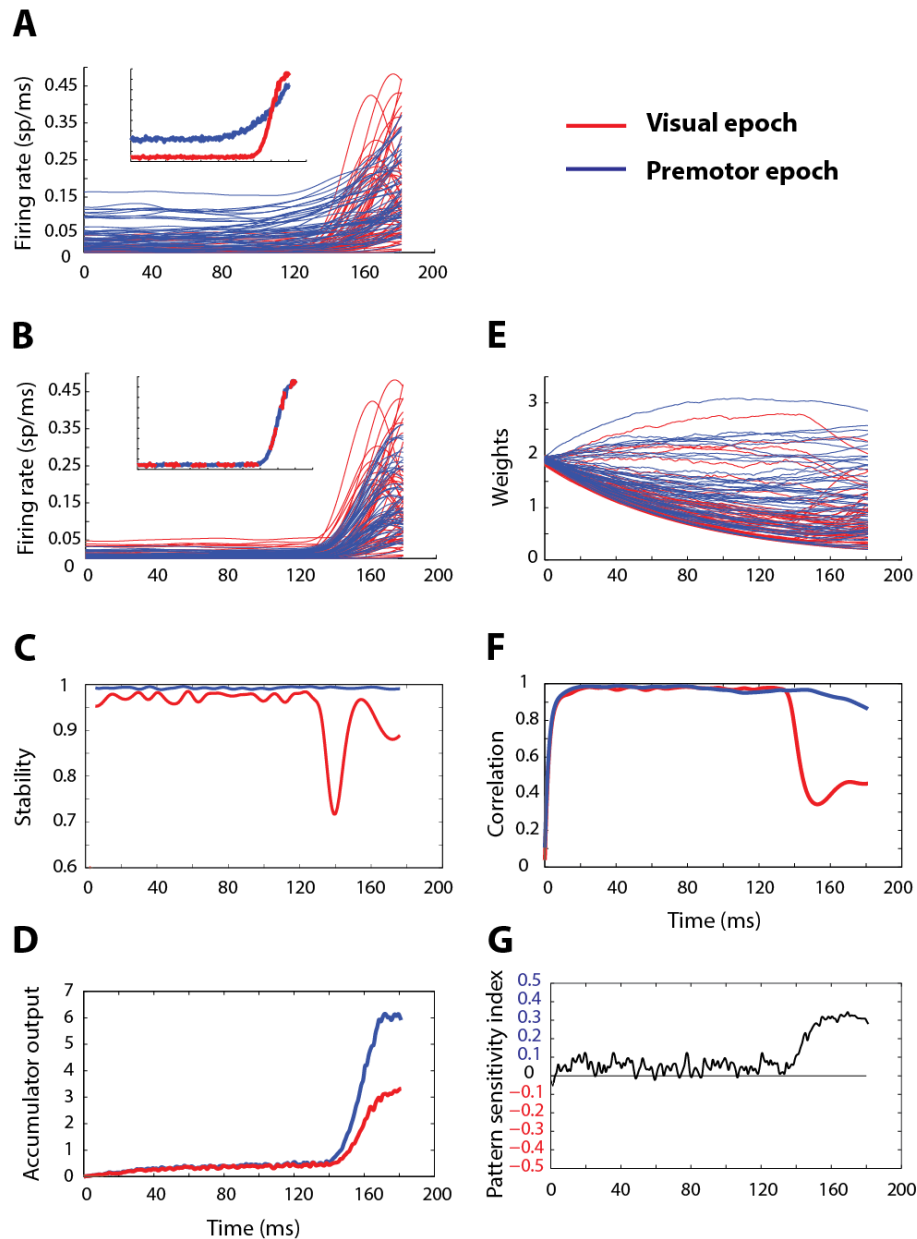

947

948 **Extended Data Figure 9. Leaky accumulator with facilitation (LAF) model can discriminate population temporal**  
 949 **structure.** **A.** Inputs to the model from SC visuomovement neurons. Raw unstable (red) and stable (blue) input  
 950 profiles (inset – population means). The two sets of inputs are 180 ms snippets taken from the visual and premotor  
 951 bursts, respectively, in the spike density profiles shown in Figure 2A. **B.** Mean-matched input profiles and  
 952 population means. **C.** Temporal stability of the two mean-matched populations. **D.** Output of the LAF accumulator  
 953 in response to the stable and unstable model inputs. **E.** Evolution of synaptic weights for the two conditions. **F.**  
 954 Correlation between instantaneous weights and input rates for the two conditions. **G.** Pattern sensitivity index of  
 955 the model's ability to discriminate between the two types of inputs. Values in the top half of the plot indicate  
 956 higher sensitivity (faster accumulation) to stable population input.

957

958 **Extended Data Table 1. Values of the constants and parameters used for the spiking neuron model.**

| <b>Biophysical constants</b> | <b>Values</b>                           |
|------------------------------|-----------------------------------------|
| $\tau_m$                     | 10 ms                                   |
| $R_m$                        | 10 Mohms                                |
| $V_{th}$                     | -50 mV                                  |
| $V_{rest}$                   | -65 mV                                  |
| $V_{reset}$                  | -70 mV                                  |
| $E_{exc}$                    | 50 mV                                   |
| $E_{inh}$                    | -80 mV                                  |
| <b>Model parameters</b>      |                                         |
| $\tau_1$                     | 2 ms                                    |
| $\tau_2$                     | 10 ms                                   |
| $w^{exc-dec}$                | $5 \times 10^{-6}$ <i>uniform</i> [0,2] |
| $w^{dis-dec}$                | 5                                       |
| $w^{exc-dis}$                | $0.2 w^{exc-dec}$                       |
| $w^{inh-dis}$                | $0.8 w^{exc-dec}$                       |
| $w^{dec-dis}$                | 0.1                                     |
| <b>Numerical parameters</b>  |                                         |
| $dt$ (time step)             | 0.05                                    |

959

960 **S1. Inferring population dynamics from single-unit recordings**

961 The main text and methods describe how we reconstructed a pseudo-population from unit recordings.  
962 Using knowledge of the RF centre of a given session's local population obtained from microstimulation,  
963 and known transformation from visual space to SC tissue coordinates, here we reconstruct the pseudo-  
964 population on the SC map.

965 We first transferred target locations  $(R_T, \theta_T)$  inside the RF for each neuron onto the SC map using the  
966 following transformations<sup>41</sup> –

967 
$$x_T = \frac{B_x}{2} \ln \frac{(H+A)^2 + V^2}{A^2}, y_T = B_y \tan^{-1} \frac{V}{H+A}, \text{ where,}$$

968 
$$H = R_T \cos \theta_T, V = R_T \sin \theta_T, \text{ and } A = 3, B_x = 1.4, B_y = 1.8.$$

969 The transformed locations  $(x_T, y_T)$  on the bilateral SC map are shown in EDF 2, top row. In order to  
970 move these target locations to one pseudo-population, we need to identify where these points reside in  
971 the RF of each neuron or local population. We used the endpoints of the site-specific microstimulation-  
972 evoked saccades as a proxy for the respective RF centres. The transformed endpoints, with their  
973 locations relative to the corresponding target locations, are shown in EDF 2, middle row. We picked an  
974 arbitrary location in the visual field as the RF centre of the pseudo-population,  $(R_c, \theta_c) = (15, 0)$ . We  
975 used the fact that the size of the active SC population is invariant regardless of the encoded saccade to  
976 preserve relative distances in tissue space between a site's target location and RF centre, and translated  
977 the transformed microstimulation endpoints to the common pseudo-population centre, along with the  
978 respective target locations. To construct one active population from sites gleaned from both hemifields  
979 (and therefore both colliculi), we reflected the coordinates from one colliculus onto the other. The  
980 resulting pseudo-population (EDF 2, bottom row) shows a fairly representative sampling of neurons  
981 from the pseudo-population, with its extent consistent with a large (25% of SC tissue) active population,  
982 albeit one that is biased to one side of the population.

983



## 984 **S2. Leaky accumulator with facilitation (LAF) model**

985 We developed an alternative computational model to demonstrate how the temporal structure of  
986 population activity could be used by neural circuits to gate decisions such as movement initiation.  
987 Similar to the spiking neuron model presented in the main text, a core principle behind this model is the  
988 hypothesis that signal integration is stronger when the temporal structure in input activity is stable,  
989 which allows the decoder neuron to reach threshold during the high frequency burst that triggers the  
990 movement. We constructed an accumulator as an abstraction of a neuron receiving population inputs  
991 through its network of dendrites. The total synaptic current  $I(t)$  and the firing rate  $v(t)$  of the  
992 accumulator were defined as

$$\tau_s \dot{I} = -I + \sum_1^n w_i u_i$$

993 and

$$v = F(I)$$

994 where  $u_i$  and  $w_i$  are the instantaneous firing rate and synaptic gain of the  $i^{\text{th}}$  input neuron, and  $\tau_s$  is the  
995 time constant of the synaptic current. The output firing rate of the single decoder neuron  $v(t)$  can be  
996 described by a standard monotonic function (e.g., linear or sigmoid) applied to the net current<sup>46</sup>. The  
997 family of stochastic, leaky accumulator models that integrate the firing rate of neurons toward a  
998 threshold criterion has been commonly used to explain reaction times, decision making, and  
999 perception<sup>20,47-49</sup>. We used the following heuristic in order to extend this framework to incorporate  
1000 temporal structure. In order to assess stability, the decoder neuron must keep track of the short term  
1001 history of the population activity, use this “memory” to evaluate stability, and respond selectively when  
1002 the activity pattern is deemed stable over some time scale. We implemented these requirements by  
1003 introducing short-term plasticity in the form of facilitatory connections<sup>50,51</sup> from the input population  
1004 onto the output unit (accumulator). The change in connection strength or gain of each neuron on the  
1005 decoder neuron  $w_i$  can be defined by a differential equation that incorporates a Hebbian-like learning  
1006 rule and leak current:

$$\tau_w \dot{w}_i = -w_i + \frac{u_i v}{w n f_i}$$

1007 The Hebbian-learning component,  $u_i v$  describes the change in weight coupled to the firing rates of the  
1008  $i^{\text{th}}$  pre-synaptic neuron and the post-synaptic accumulator neuron.  $\tau_w$  is the time constant of the weight  
1009 parameter. Since this version of the model contains only excitatory connections, the weight parameter  
1010 can exhibit unbounded accumulation, which can be controlled by incorporating normalization. We  
1011 normalized the Hebbian-learning component  $u_i v$  with the contribution of that neuron to the total  
1012 resource pool. The resource pool available for facilitation at any given time was defined as the sum of  
1013 the Hebbian-learning component across all input units  $\sum_1^n u_i v$ . The contribution of a neuron to the  
1014 output rate  $v(t)$  then determines its contribution to the overall pool, giving rise to the weight  
1015 normalization factor:

$$w n f_i = \sum_1^n u_i w_i u_i$$

1016 For this model simulation, we used visuomovement neuron activity drawn from the SC pseudo-  
1017 population as inputs (EDF 8A). We created two sets of input snippets from the visual and premotor  
1018 bursts, each 180 ms in length. For the visual burst, we used the activity upto the peak in the population  
1019 response. For the premotor burst, we used activity upto 35 ms before saccade onset (which was the  
1020 time when the response magnitude reached the same level as the peak of the visual burst). In order to  
1021 control for the effect of average firing rate on the accumulation, we mean-matched the input profiles as  
1022 follows. We divided the activations in the premotor input set at each instant by the mean activation of  
1023 the visual inputs at the corresponding instant. That is,

$$u_i^{pre}(t)_{mm} = \frac{u_i^{pre}(t)}{\frac{1}{n} \sum_1^n u_i^{vis}(t)}$$

1024 where  $u_i^{vis}(t)$  and  $u_i^{pre}(t)$  are the activity of neuron  $i$  at time  $t$  in the visual and premotor input sets,  
1025 respectively, and  $u_i^{pre}(t)_{mm}$  is the premotor input instantaneously rescaled to match the mean of the  
1026 visual input (EDF 8B). This ensured that we isolated the effect of temporal structure (EDF 8C),  
1027 independent of firing rate, on the model's response.

1028 The accumulator increased its activity at a faster rate in response to the stable pattern compared to the  
1029 unstable pattern (EDF 8D), suggesting that the network was able to discriminate between two types of  
1030 population patterns even though the net input drive was identical. How critical is facilitation to this  
1031 function? Like the inputs themselves, the weights also showed greater fluctuation during the visual burst  
1032 (EDF 8E). Consistent with our heuristic, the weights tracked the input rates when the input was stable,  
1033 but this correlation dropped away when the input was unstable (EDF 8F). Note that the shape of the  
1034 correlation profile is not unlike the stability profile in EDF 8C. Therefore, facilitation allows the weights  
1035 to retain the memory of a pattern over the time scale of tens of milliseconds, but the memory can be  
1036 scrambled by a fluctuating input pattern.

1037 We also quantified the ability of the synaptic weights to track the inputs by computing the Pearson's  
1038 correlation between the weight and input vectors at each time point (EDF 8G). To quantify the  
1039 accumulator's ability to discriminate temporal pattern in population input, we computed a pattern  
1040 sensitivity index ( $psi$ ) as

$$psi(t) = \frac{v^{pre}(t) - v^{vis}(t)}{v^{pre}(t) + v^{vis}(t)}$$

1041 where  $v(t)$  is the output of the accumulation for the corresponding inputs.

1042 The results here suggest that the accumulator is driven more strongly by the stable premotor burst,  
1043 even when other features of population activity remain the same, providing yet another biophysical  
1044 mechanism by which temporal structure could be read out.

1045

1046 **References**

- 1047 1 Wurtz, R. H., Sommer, M. A., Paré, M. & Ferraina, S. Signal transformations from cerebral cortex  
1048 to superior colliculus for the generation of saccades. *Vision Res* **41**, 3399-3412 (2001).
- 1049 2 Buneo, C. A., Jarvis, M. R., Batista, A. P. & Andersen, R. A. Direct visuomotor transformations for  
1050 reaching. *Nature* **416**, 632-636 (2002).
- 1051 3 Gallese, V., Fadiga, L., Fogassi, L. & Rizzolatti, G. Action recognition in the premotor cortex. *Brain*  
1052 *: a journal of neurology* **119 ( Pt 2)**, 593-609 (1996).
- 1053 4 Miyashita, N. & Hikosaka, O. Minimal synaptic delay in the saccadic output pathway of the  
1054 superior colliculus studied in awake monkey. *Experimental brain research* **112**, 187-196 (1996).
- 1055 5 Hanes, D. P. & Schall, J. D. Neural control of voluntary movement initiation. *Science* **274**, 427-  
1056 430 (1996).
- 1057 6 Jantz, J. J., Watanabe, M., Everling, S. & Munoz, D. P. Threshold mechanism for saccade initiation  
1058 in the frontal eye field and superior colliculus. *J Neurophysiol* **109**, 2767-2780 (2013).
- 1059 7 Rodgers, C. K., Munoz, D. P., Scott, S. H. & Pare, M. Discharge properties of monkey  
1060 tectoreticular neurons. *J Neurophysiol* **95**, 3502-3511 (2006).
- 1061 8 Segraves, M. A. Activity of monkey frontal eye field neurons projecting to oculomotor regions of  
1062 the pons. *J Neurophysiol* **68**, 1967-1985 (1992).
- 1063 9 Branco, T., Clark, B. A. & Hausser, M. Dendritic discrimination of temporal input sequences in  
1064 cortical neurons. *Science* **329**, 1671-1675 (2010).
- 1065 10 Carter, A. G., Soler-Llavina, G. J. & Sabatini, B. L. Timing and location of synaptic inputs  
1066 determine modes of subthreshold integration in striatal medium spiny neurons. *J Neurosci* **27**,  
1067 8967-8977 (2007).
- 1068 11 Harvey, M. A., Saal, H. P., Dammann, J. F., 3rd & Bensmaia, S. J. Multiplexing stimulus  
1069 information through rate and temporal codes in primate somatosensory cortex. *PLoS biology* **11**,  
1070 e1001558 (2013).
- 1071 12 Bruce, C. J. & Goldberg, M. E. Primate frontal eye fields. I. Single neurons discharging before  
1072 saccades. *J Neurophysiol* **53**, 603-635 (1985).
- 1073 13 Munoz, D. P. & Wurtz, R. H. Fixation cells in monkey superior colliculus. I. Characteristics of cell  
1074 discharge. *J Neurophysiol* **70**, 559-575 (1993).
- 1075 14 Moschovakis, A. K. *et al.* An anatomical substrate for the spatiotemporal transformation. *J*  
1076 *Neurosci* **18**, 10219-10229 (1998).
- 1077 15 Hafed, Z. M., Goffart, L. & Krauzlis, R. J. A neural mechanism for microsaccade generation in the  
1078 primate superior colliculus. *Science* **323**, 940-943 (2009).
- 1079 16 Churchland, M. M. *et al.* Neural population dynamics during reaching. *Nature* **487**, 51-56 (2012).
- 1080 17 Kaufman, M. T., Churchland, M. M., Ryu, S. I. & Shenoy, K. V. Cortical activity in the null space:  
1081 permitting preparation without movement. *Nature neuroscience* **17**, 440-448 (2014).
- 1082 18 Elsayed, G. F., Lara, A. H., Kaufman, M. T., Churchland, M. M. & Cunningham, J. P.  
1083 Reorganization between preparatory and movement population responses in motor cortex. *Nat*  
1084 *Commun* **7**, 13239, doi:10.1038/ncomms13239 (2016).
- 1085 19 Cowley, B. R. *et al.* DataHigh: graphical user interface for visualizing and interacting with high-  
1086 dimensional neural activity. *Journal of neural engineering* **10**, 066012, doi:10.1088/1741-  
1087 2560/10/6/066012 (2013).
- 1088 20 Zandbelt, B., Purcell, B. A., Palmeri, T. J., Logan, G. D. & Schall, J. D. Response times from  
1089 ensembles of accumulators. *Proceedings of the National Academy of Sciences of the United*  
1090 *States of America* **111**, 2848-2853, doi:10.1073/pnas.1310577111 (2014).

- 1091 21 Takahashi, M., Sugiuchi, Y., Izawa, Y. & Shinoda, Y. Commissural excitation and inhibition by the  
1092 superior colliculus in tectoreticular neurons projecting to omnipause neuron and inhibitory burst  
1093 neuron regions. *J Neurophysiol* **94**, 1707-1726 (2005).
- 1094 22 Gandhi, N. J. & Keller, E. L. Activity of the brain stem omnipause neurons during saccades  
1095 perturbed by stimulation of the primate superior colliculus. *J Neurophysiol* **82**, 3254-3267  
1096 (1999).
- 1097 23 Deisz, R. A., Fortin, G. & Zieglgansberger, W. Voltage dependence of excitatory postsynaptic  
1098 potentials of rat neocortical neurons. *J Neurophysiol* **65**, 371-382, doi:10.1152/jn.1991.65.2.371  
1099 (1991).
- 1100 24 Stuart, G. & Sakmann, B. Amplification of EPSPs by axosomatic sodium channels in neocortical  
1101 pyramidal neurons. *Neuron* **15**, 1065-1076 (1995).
- 1102 25 Keller, E. L. Participation of medial pontine reticular formation in eye movement generation in  
1103 monkey. *J Neurophysiol* **37**, 316-332 (1974).
- 1104 26 Everling, S., Paré, M., Dorris, M. C. & Munoz, D. P. Comparison of the discharge characteristics of  
1105 brain stem omnipause neurons and superior colliculus fixation neurons in monkey: implications  
1106 for control of fixation and saccade behavior. *J Neurophysiol* **79**, 511-528 (1998).
- 1107 27 Hauser, C. K., Zhu, D., Stanford, T. R. & Salinas, E. Motor selection dynamics in FEF explain the  
1108 reaction time variance of saccades to single targets. *Elife* **7**, doi:10.7554/eLife.33456 (2018).
- 1109 28 Jagadisan, U. K. & Gandhi, N. J. Disruption of Fixation Reveals Latent Sensorimotor Processes in  
1110 the Superior Colliculus. *J Neurosci* **36**, 6129-6140, doi:10.1523/JNEUROSCI.3685-15.2016 (2016).
- 1111 29 Corneil, B. D., Olivier, E. & Munoz, D. P. Visual responses on neck muscles reveal selective gating  
1112 that prevents express saccades. *Neuron* **42**, 831-841 (2004).
- 1113 30 Gu, C., Wood, D. K., Gribble, P. L. & Corneil, B. D. A Trial-by-Trial Window into Sensorimotor  
1114 Transformations in the Human Motor Periphery. *J Neurosci* **36**, 8273-8282,  
1115 doi:10.1523/JNEUROSCI.0899-16.2016 (2016).
- 1116 31 Rizzolatti, G., Riggio, L., Dascola, I. & Umiltà, C. Reorienting attention across the horizontal and  
1117 vertical meridians: evidence in favor of a premotor theory of attention. *Neuropsychologia* **25**,  
1118 31-40 (1987).
- 1119 32 Vigneswaran, G., Philipp, R., Lemon, R. N. & Kraskov, A. M1 corticospinal mirror neurons and  
1120 their role in movement suppression during action observation. *Curr Biol* **23**, 236-243 (2013).
- 1121 33 Tan, A. Y., Chen, Y., Scholl, B., Seidemann, E. & Priebe, N. J. Sensory stimulation shifts visual  
1122 cortex from synchronous to asynchronous states. *Nature* **509**, 226-229,  
1123 doi:10.1038/nature13159 (2014).
- 1124 34 Hauptmann, C. & Tass, P. A. Restoration of segregated, physiological neuronal connectivity by  
1125 desynchronizing stimulation. *Journal of neural engineering* **7**, 056008, doi:10.1088/1741-  
1126 2560/7/5/056008 (2010).
- 1127 35 Popovych, O. V. & Tass, P. A. Control of abnormal synchronization in neurological disorders.  
1128 *Front Neurol* **5**, 268, doi:10.3389/fneur.2014.00268 (2014).
- 1129 36 Softky, W. Sub-millisecond coincidence detection in active dendritic trees. *Neuroscience* **58**, 13-  
1130 41 (1994).
- 1131 37 Bryant, C. L. & Gandhi, N. J. Real-time data acquisition and control system for the measurement  
1132 of motor and neural data. *J Neurosci Methods* **142**, 193-200 (2005).
- 1133 38 Sparks, D. L., Holland, R. & Guthrie, B. L. Size and distribution of movement fields in the monkey  
1134 superior colliculus. *Brain Res* **113**, 21-34 (1976).
- 1135 39 Mante, V., Sussillo, D., Shenoy, K. V. & Newsome, W. T. Context-dependent computation by  
1136 recurrent dynamics in prefrontal cortex. *Nature* **503**, 78-84 (2013).
- 1137 40 Rigotti, M. *et al.* The importance of mixed selectivity in complex cognitive tasks. *Nature* **497**,  
1138 585-590 (2013).

- 1139 41 Ottes, F. P., Van Gisbergen, J. A. & Eggermont, J. J. Visuomotor fields of the superior colliculus: a  
1140 quantitative model. *Vision Res* **26**, 857-873 (1986).
- 1141 42 Jagadisan, U. K. & Gandhi, N. J. Removal of inhibition uncovers latent movement potential  
1142 during preparation. *Elife* **6**, doi:10.7554/eLife.29648 (2017).
- 1143 43 Fisher, R. A. The use of multiple measurements in taxonomic problems. *Ann Eugenics* **7**, 179-188,  
1144 doi:DOI 10.1111/j.1469-1809.1936.tb02137.x (1936).
- 1145 44 Matthews, B. W. Comparison of the predicted and observed secondary structure of T4 phage  
1146 lysozyme. *Biochim Biophys Acta* **405**, 442-451 (1975).
- 1147 45 Boughorbel, S., Jarray, F. & El-Anbari, M. Optimal classifier for imbalanced data using Matthews  
1148 Correlation Coefficient metric. *PLoS One* **12**, e0177678, doi:10.1371/journal.pone.0177678  
1149 (2017).
- 1150 46 Rauch, A., La Camera, G., Luscher, H. R., Senn, W. & Fusi, S. Neocortical pyramidal cells respond  
1151 as integrate-and-fire neurons to in vivo-like input currents. *J Neurophysiol* **90**, 1598-1612 (2003).
- 1152 47 Usher, M. & McClelland, J. L. The time course of perceptual choice: the leaky, competing  
1153 accumulator model. *Psychol Rev* **108**, 550-592 (2001).
- 1154 48 Purcell, B. A. *et al.* Neurally constrained modeling of perceptual decision making. *Psychol Rev*  
1155 **117**, 1113-1143, doi:10.1037/a0020311 (2010).
- 1156 49 Wong, K. F., Huk, A. C., Shadlen, M. N. & Wang, X. J. Neural circuit dynamics underlying  
1157 accumulation of time-varying evidence during perceptual decision making. *Front Comput*  
1158 *Neurosci* **1**, 6, doi:10.3389/neuro.10.006.2007 (2007).
- 1159 50 Tsujimoto, T., Jeromin, A., Saitoh, N., Roder, J. C. & Takahashi, T. Neuronal calcium sensor 1 and  
1160 activity-dependent facilitation of P/Q-type calcium currents at presynaptic nerve terminals.  
1161 *Science* **295**, 2276-2279 (2002).
- 1162 51 Borst, J. G. & Sakmann, B. Facilitation of presynaptic calcium currents in the rat brainstem. *The*  
1163 *Journal of physiology* **513 ( Pt 1)**, 149-155 (1998).

1164
